# Supplementary material
Source: PubMed Central journal article supplement (PMC8564267)

Supplementary Materials for “Timeliness of provisional United States mortality data releases during the COVID-19 pandemic: delays associated with electronic death registration system and weekly mortality”

Janet E. Rosenbaum<sup>1,\*</sup>, Marco Stillo,<sup>1</sup> Nathaniel Graves,<sup>1</sup> Roberto Rivera<sup>2</sup>

1. Department of Epidemiology and Biostatistics, School of Public Health, SUNY

Downstate Health Sciences University, Brooklyn, New York, USA

2. College of Business, University of Puerto Rico at Mayagüez, Mayagüez, Puerto Rico

\*Department of Epidemiology and Biostatistics, School of Public Health, SUNY Downstate Health Sciences University, 450 Clarkson Ave, MS 43, Brooklyn, NY, 11203

Email: [janet.rosenbaum@downstate.edu](mailto:janet.rosenbaum@downstate.edu),

Table S1: Poisson regression to predict delay in mortality reporting with varying intercept by state (n=1196 observations of 52 jurisdictions) using correlation structure of order (p=2, q=2).

|                                      | IRR  | 95% CI       | p      |
|--------------------------------------|------|--------------|--------|
| Intercept                            | 4.14 | (3.67, 4.66) | <0.001 |
| Weekly deaths per 10 <sup>8</sup>    | 1.11 | (1.08, 1.13) | <0.001 |
| Electronic death registration system |      |              |        |
| Full adoption                        | Ref. |              |        |
| Partial adoption                     | 0.90 | (0.70, 1.14) | 0.4    |
| No adoption                          | 1.92 | (1.36, 2.69) | <0.001 |

IRR = incidence rate ratio, exponentiated coefficients of Poisson regression  
 95% CI = 95 percent confidence interval

Table S2: Poisson regression to predict delay in mortality reporting with varying intercept by state (n=1196 observations of 52 jurisdictions) .

|                                      | IRR  | 95% CI       | p      |
|--------------------------------------|------|--------------|--------|
| Intercept                            | 3.82 | (3.33, 4.39) | <0.001 |
| Weekly deaths per 10 <sup>8</sup>    | 1.14 | (1.08, 1.20) | <0.001 |
| Electronic death registration system |      |              |        |
| Any adoption (Full or partial)       | Ref. |              |        |
| No adoption                          | 1.86 | (1.31, 2.64) | <0.001 |

IRR = incidence rate ratio, exponentiated coefficients of Poisson regression  
 95% CI = 95 percent confidence interval

Table S3: Poisson regression to predict delay in mortality reporting with varying intercept by state (n=1196 observations of 52 jurisdictions) using log deaths per log million population.

|                                              | IRR  | 95% CI        | p      |
|----------------------------------------------|------|---------------|--------|
| Intercept                                    | 1.34 | (0.62, 1.07)  | 0.5    |
| Log weekly deaths per log million population | 22.4 | (4.02, 136.0) | <0.001 |
| Electronic death registration system         |      |               |        |
| Full adoption                                | Ref. |               |        |
| Partial adoption                             | 0.90 | (0.62, 1.07)  | 0.1    |
| No adoption                                  | 1.92 | (1.33, 2.79)  | <0.001 |

IRR = incidence rate ratio, exponentiated coefficients of Poisson regression  
 95% CI = 95 percent confidence interval

Figure S1: Spaghetti plot of weekly releases of all-cause mortality for four states in the same region: Connecticut reports deaths 4.8 weeks slower than average, and New York State (minus New York City), New Jersey, and Pennsylvania report deaths 2.5, 1.6, and 1.3 weeks faster than average.

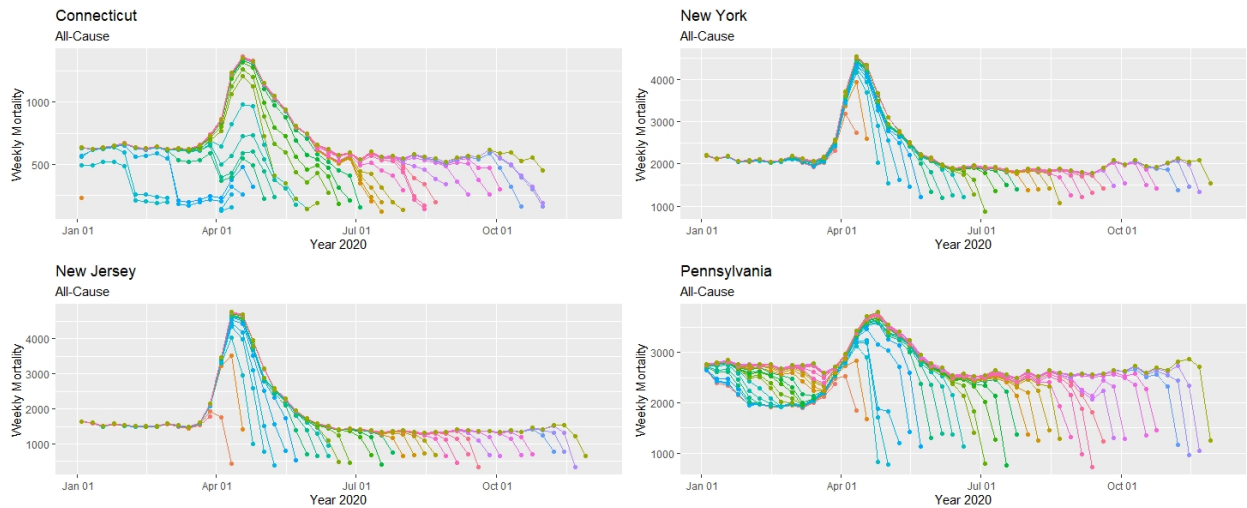

Each data point represents a provisional mortality count for that date. Each color line represents each of the 35 data releases between April 17, 2020 and December 4, 2020 in chromatic order; the chromatic order is used instead of a legend for each of the 35 colors.

Figure S2: Spaghetti plot of weekly releases of all-cause mortality for the three fastest states and three slowest states. Each data point represents a provisional mortality count for that date. Each color line represents each of the 35 data releases between April 17, 2020 and December 4, 2020 in chromatic order; the chromatic order is used instead of a legend for each of the 35 colors.

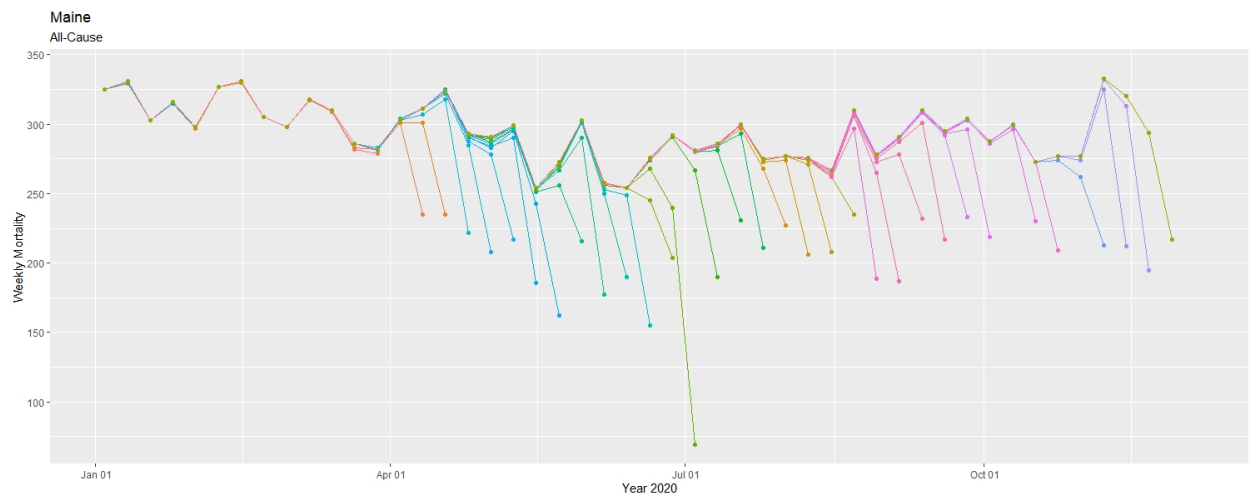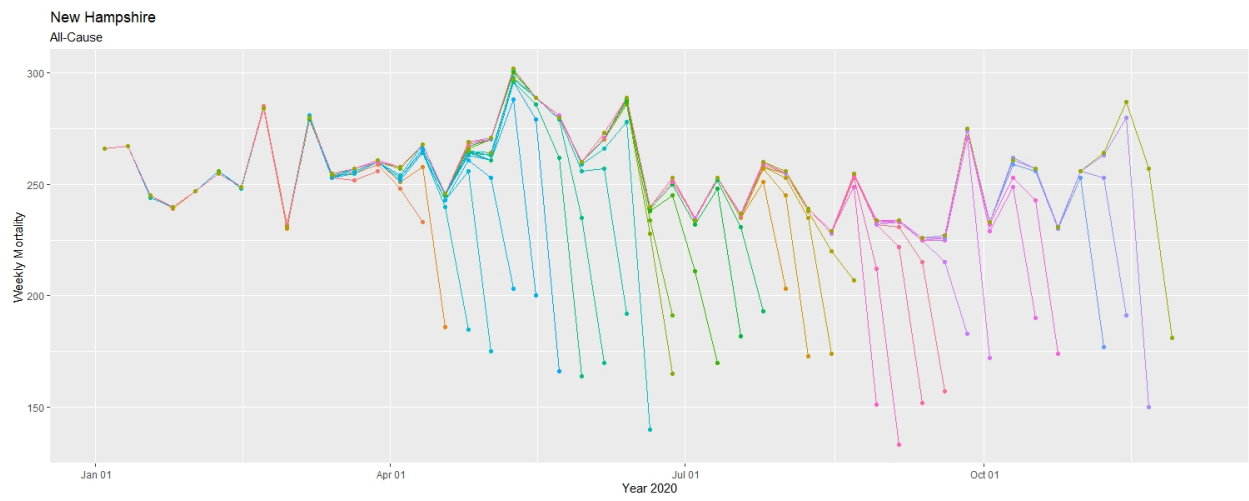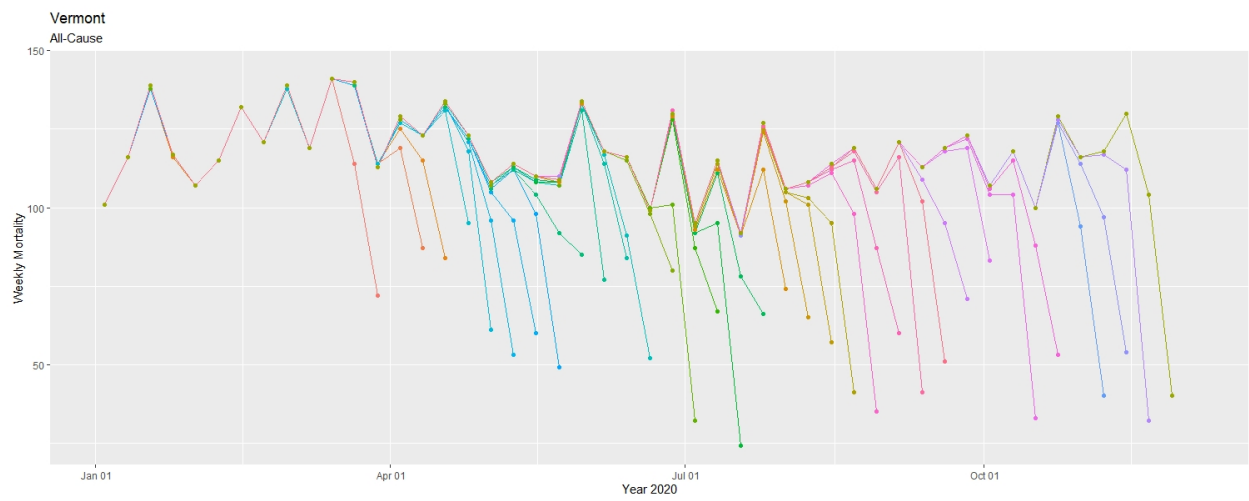

North Carolina  
All-Cause

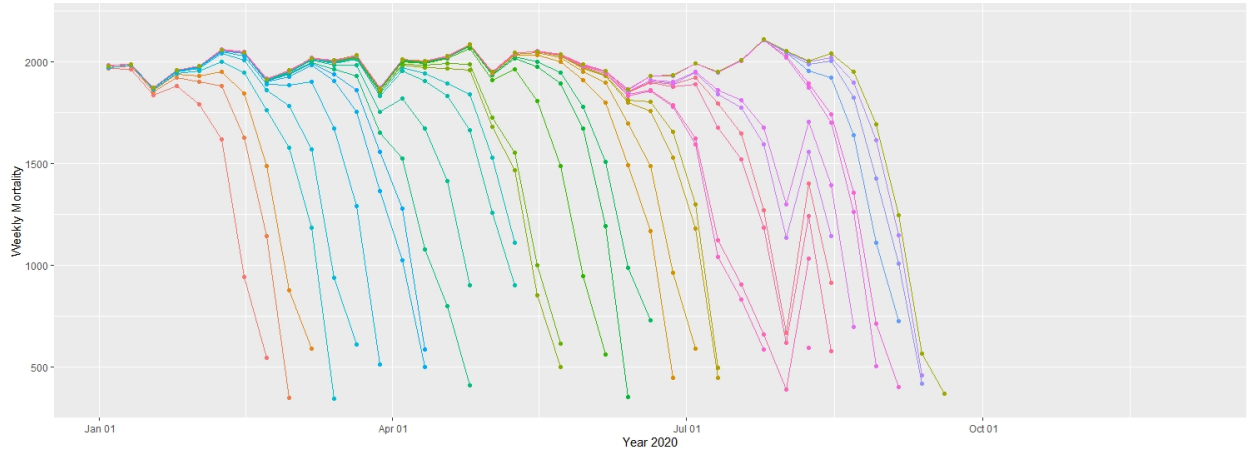

Connecticut  
All-Cause

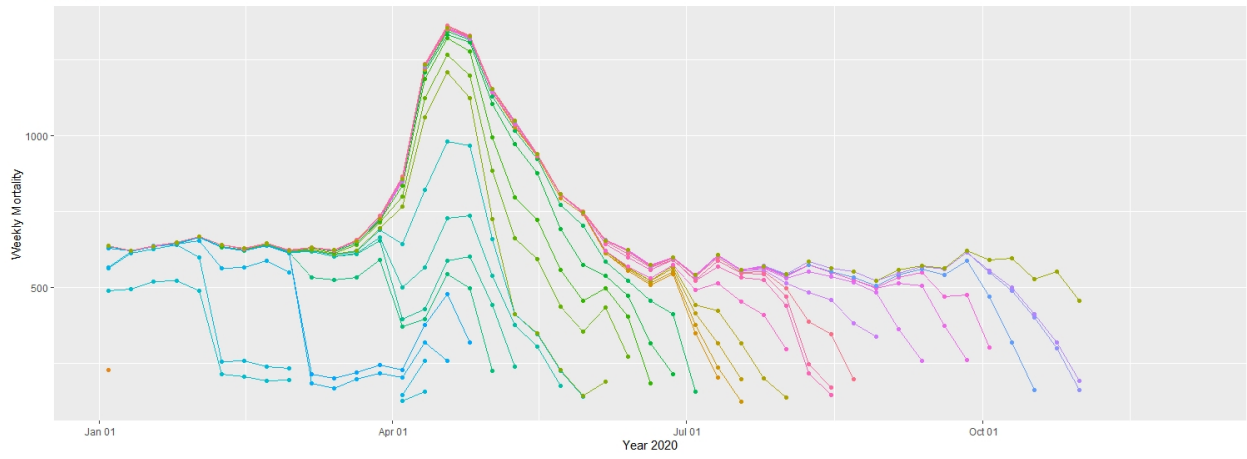

Alaska  
All-Cause

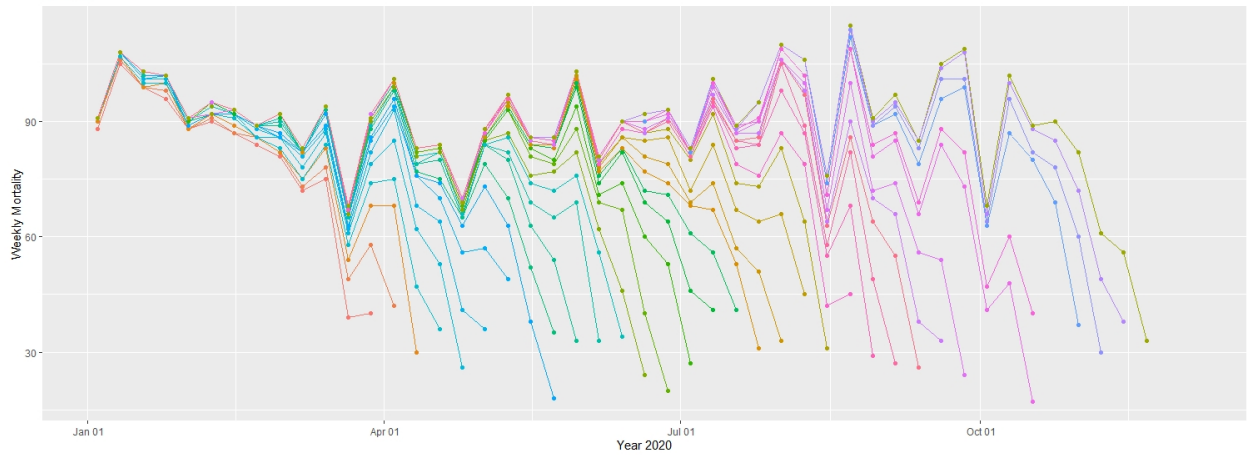

Figure S3: Weeks until all-cause mortality counts are complete for April 3-September 5, 2020, adjusted for deaths per population. The red line shows the mean delay.

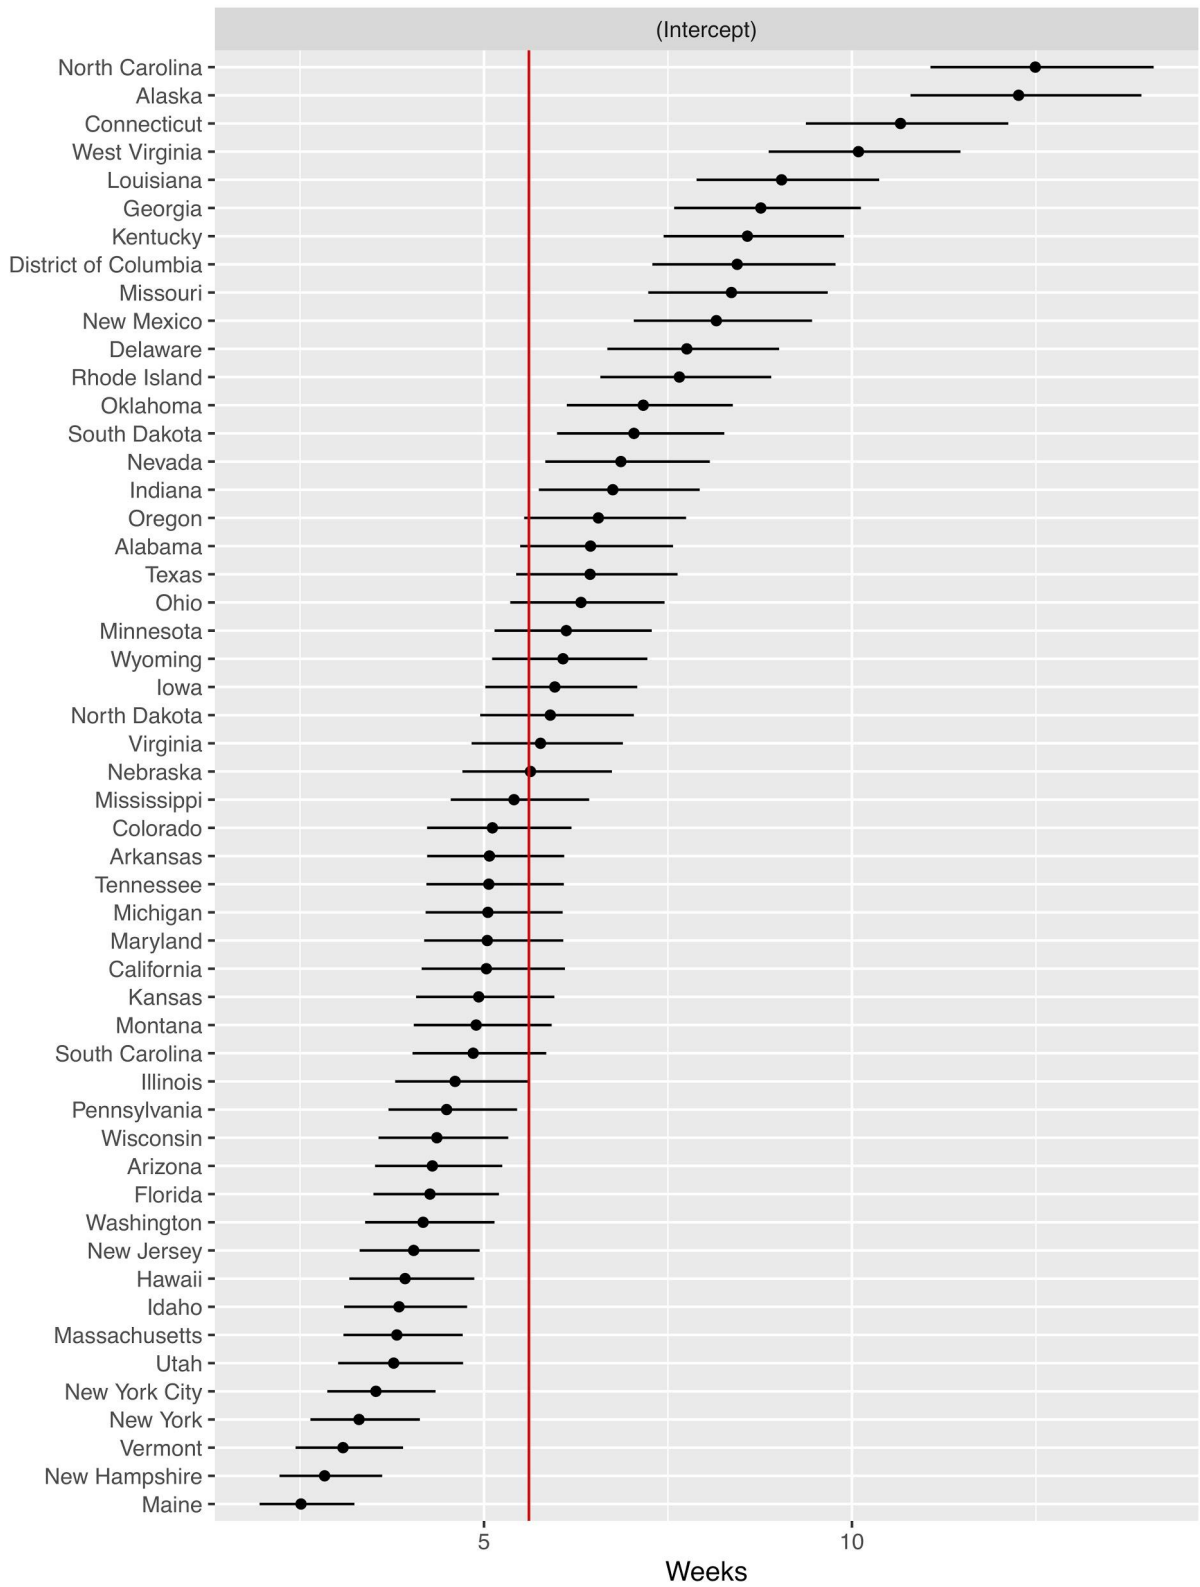

Figure S4: Spaghetti plot of weekly releases of all-cause mortality for all 50 states. Each data point represents a provisional mortality count for that date. Each color line represents each of the 35 data releases between April 17, 2020 and December 4, 2020 in chromatic order; the chromatic order is used instead of a legend for each of the 35 colors.

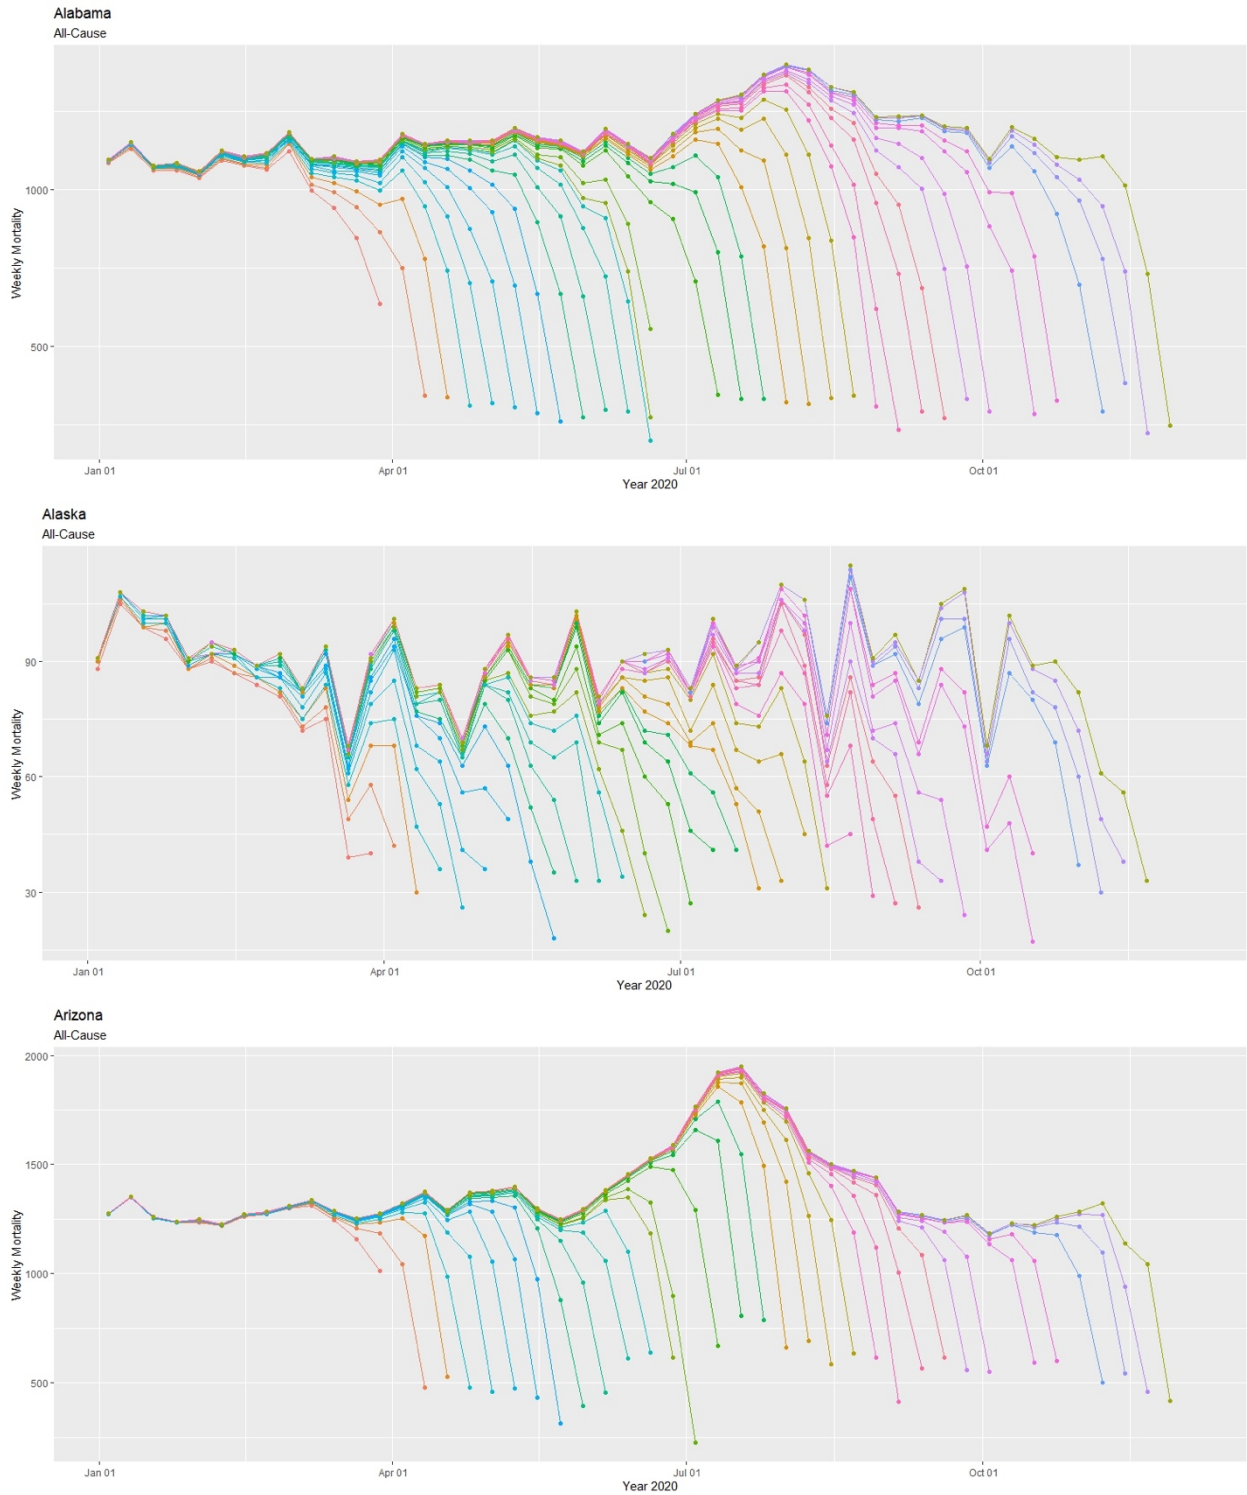



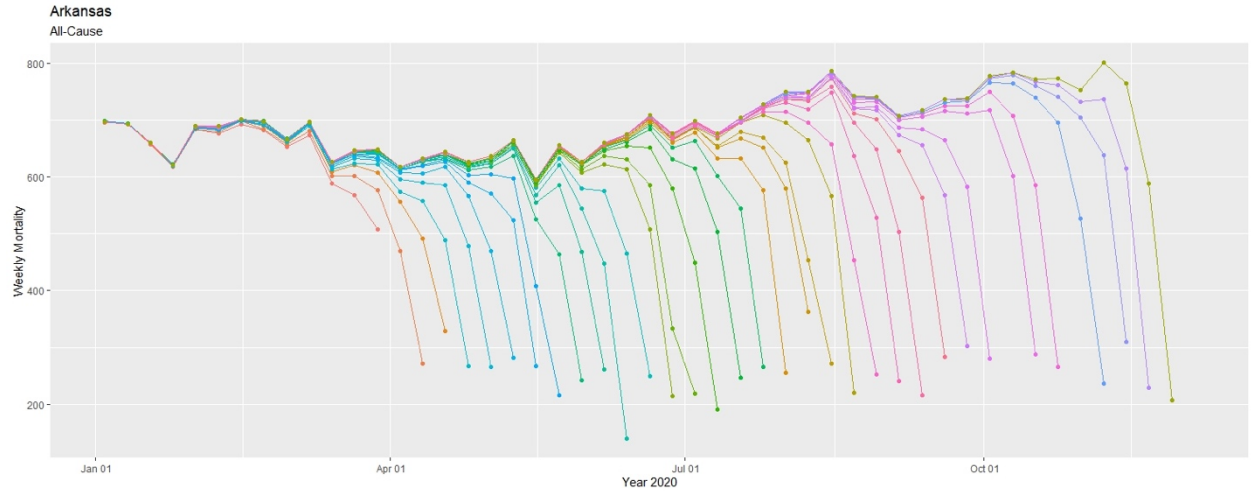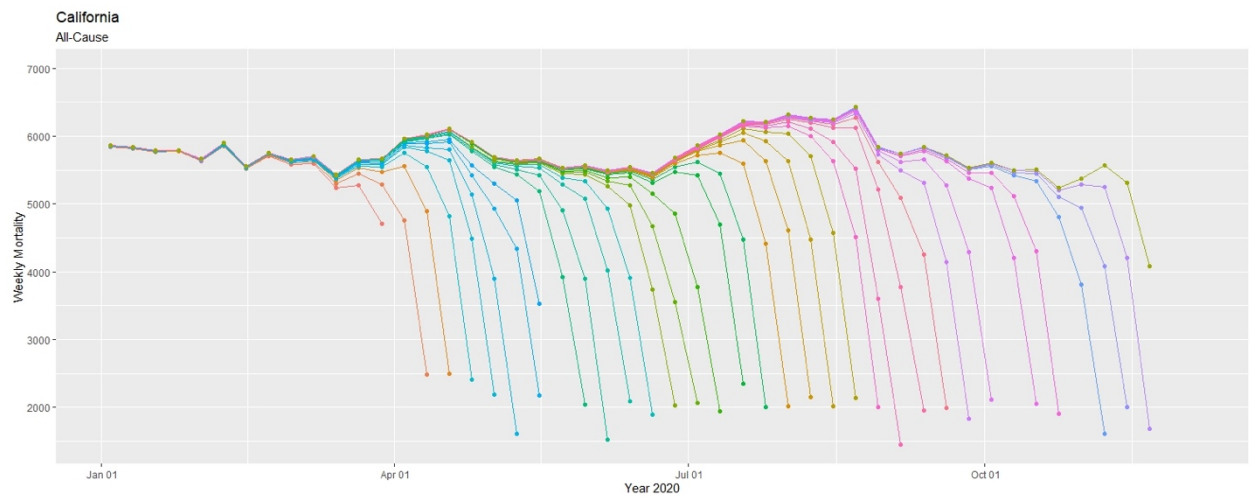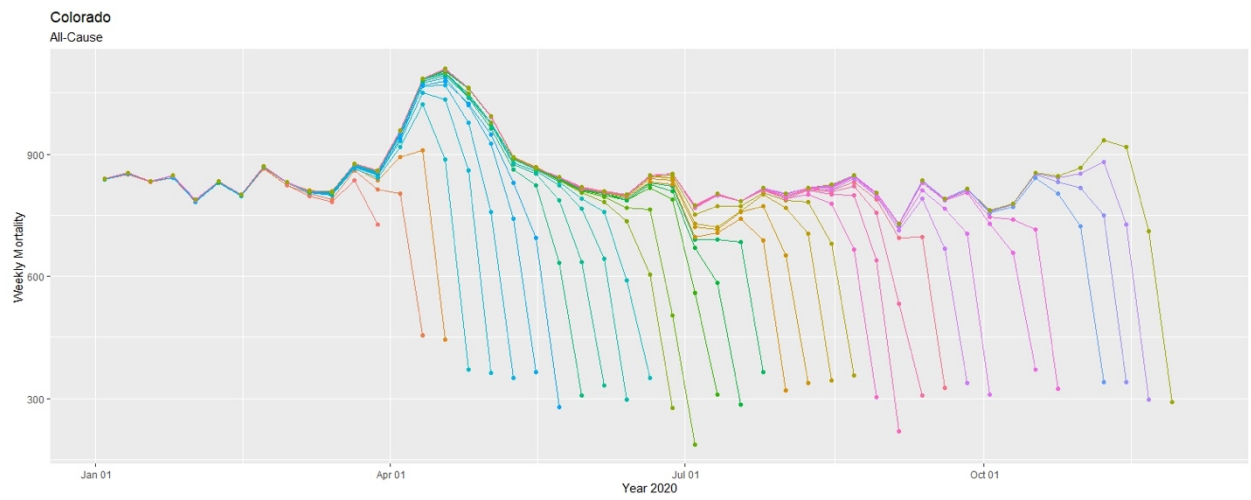

Connecticut  
All-Cause

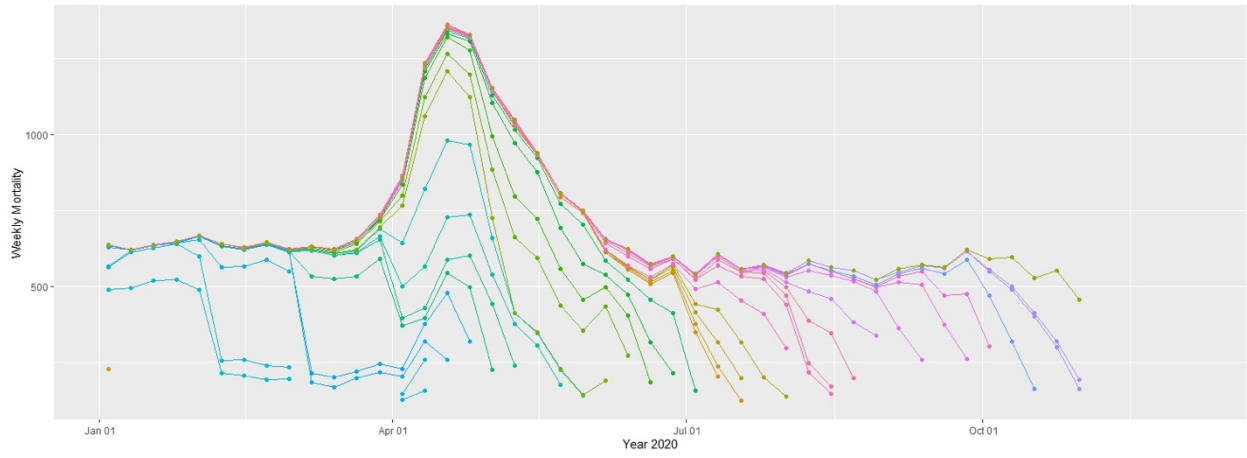

Delaware  
All-Cause

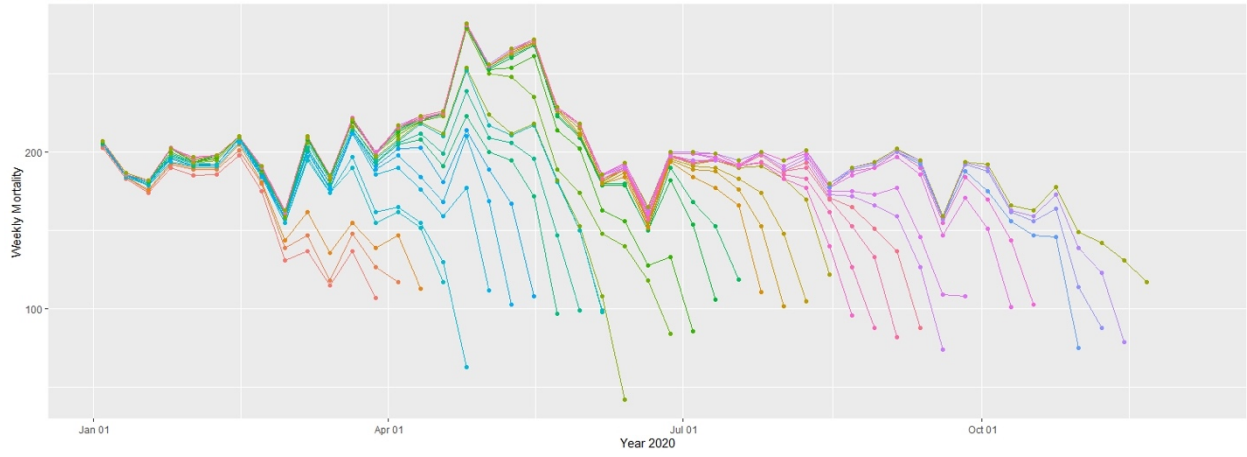

District of Columbia  
All-Cause

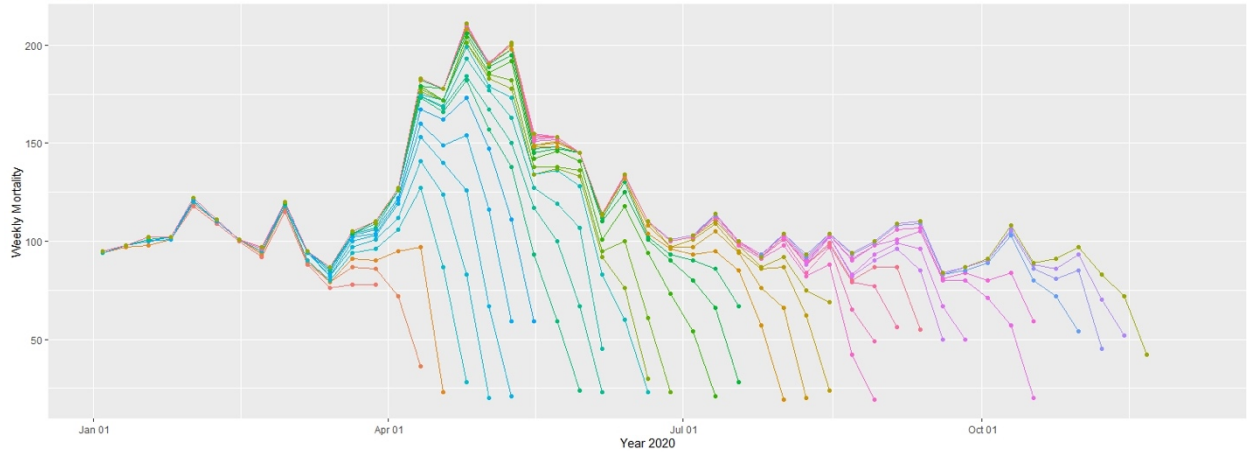

Florida  
All-Cause

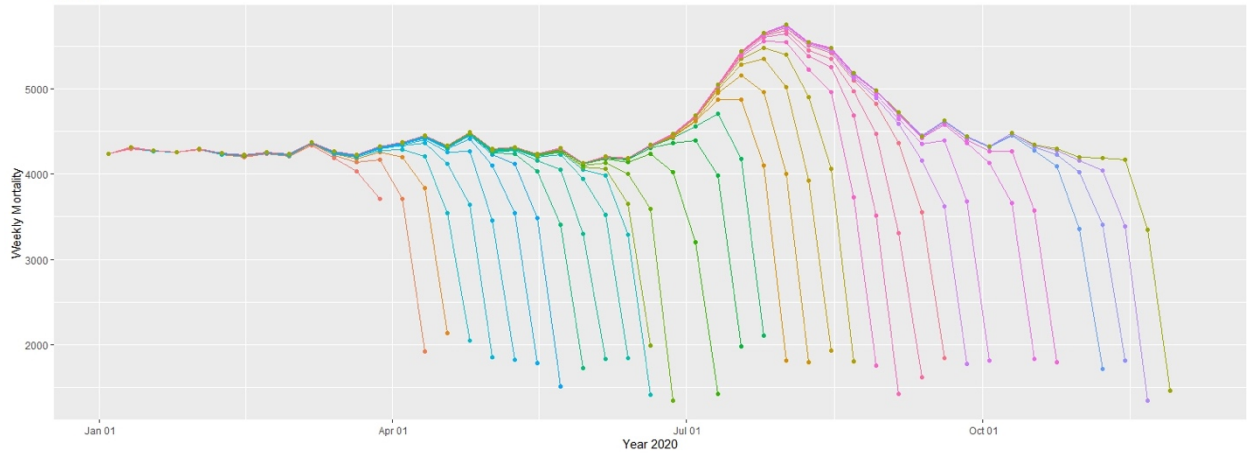

Georgia  
All-Cause

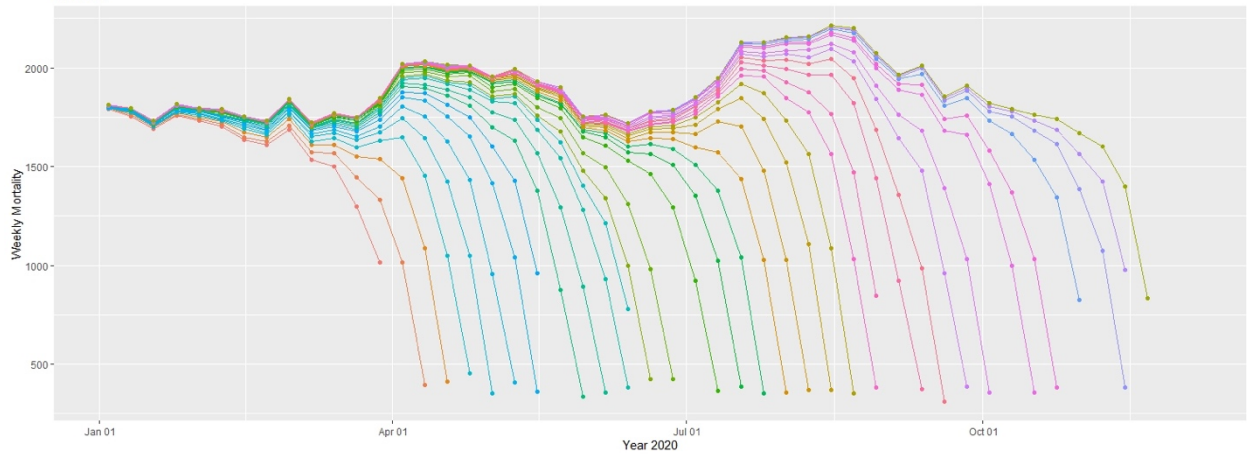

Hawaii  
All-Cause

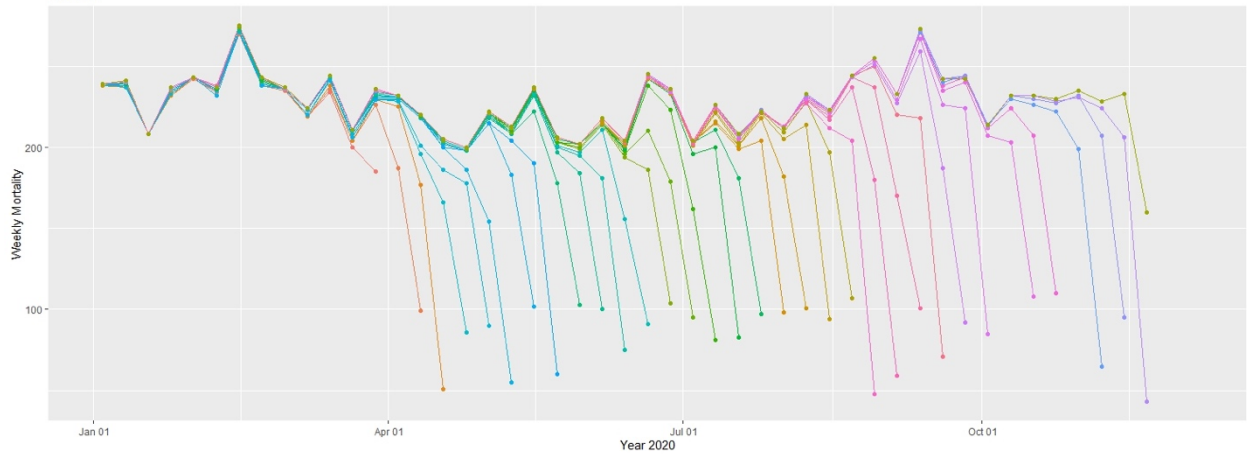

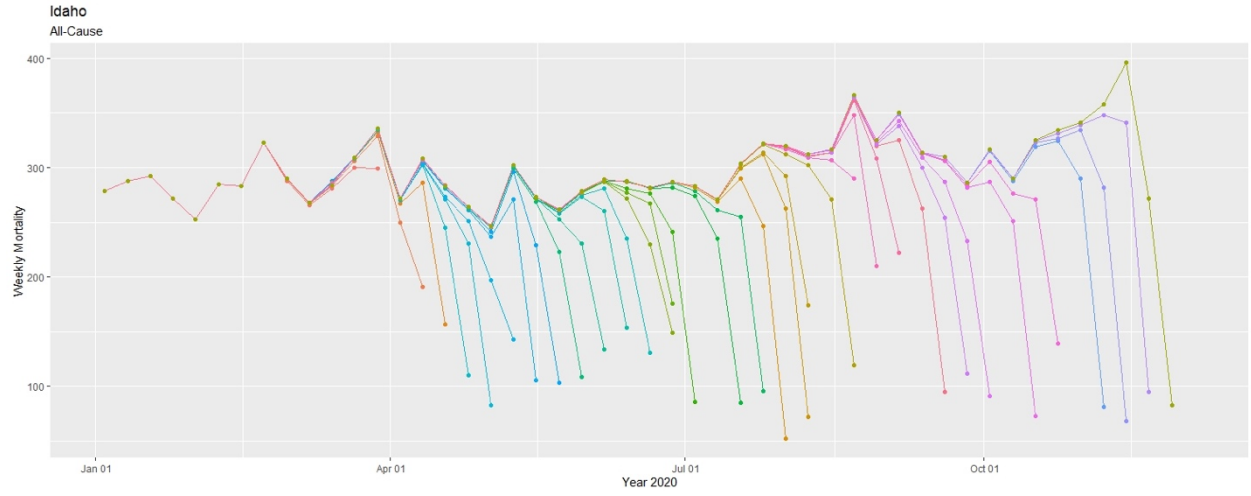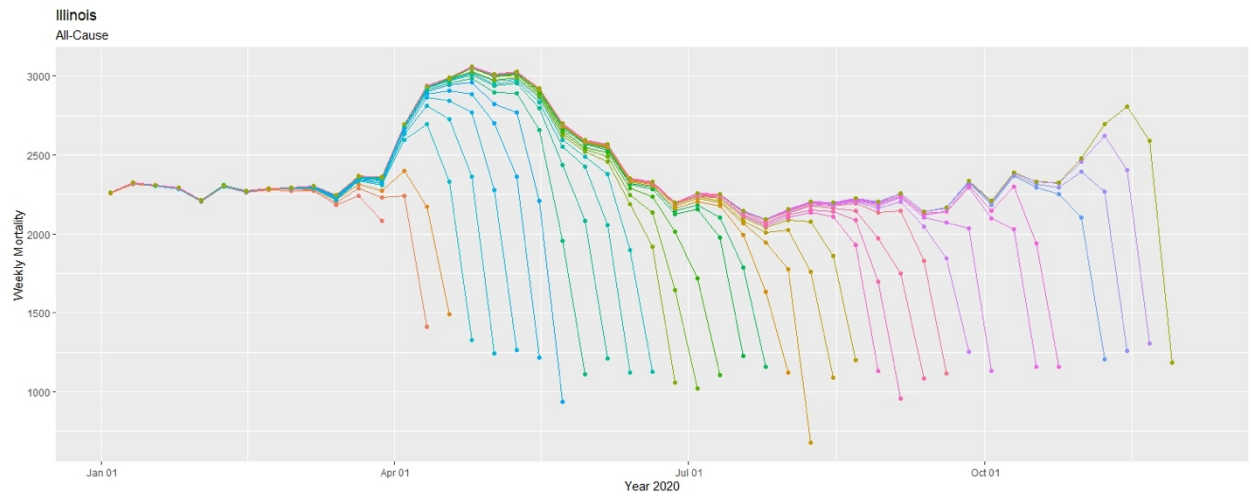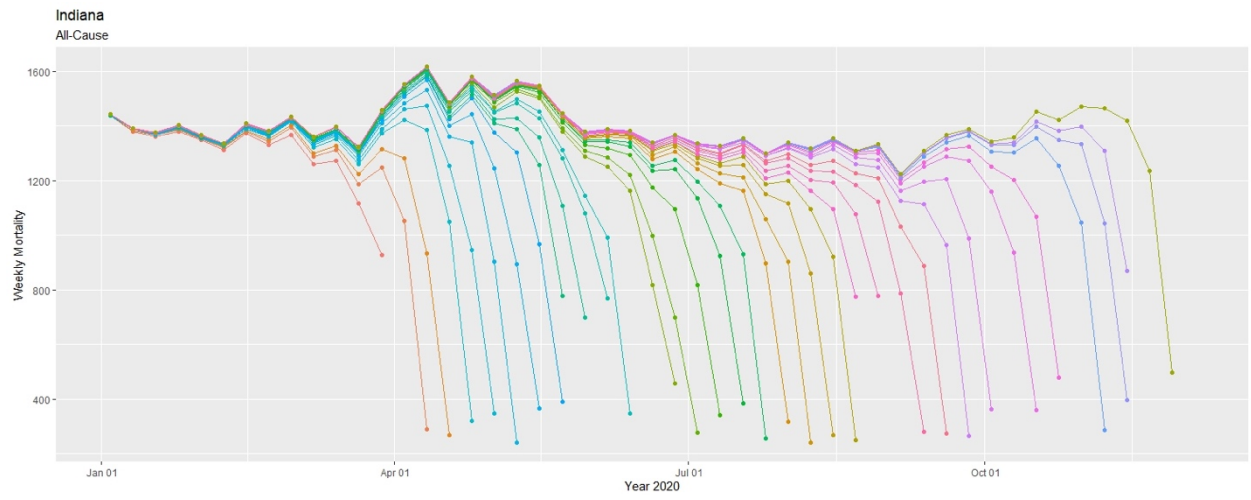

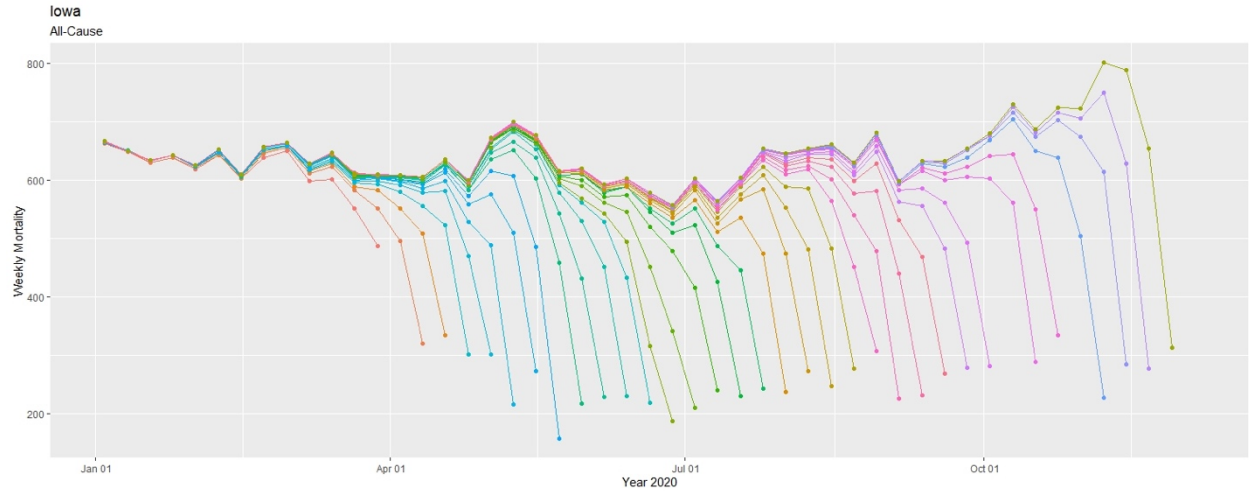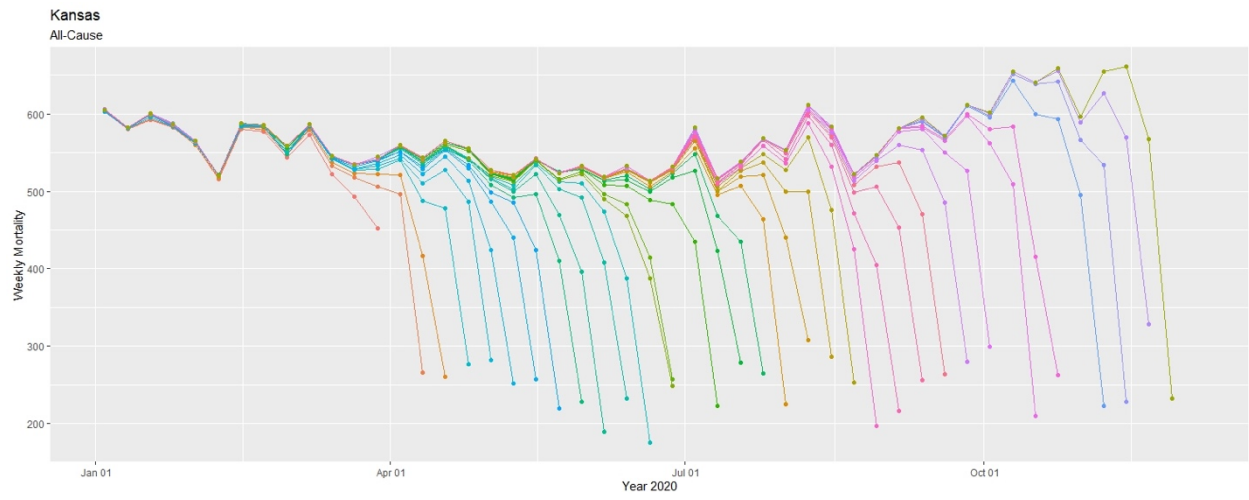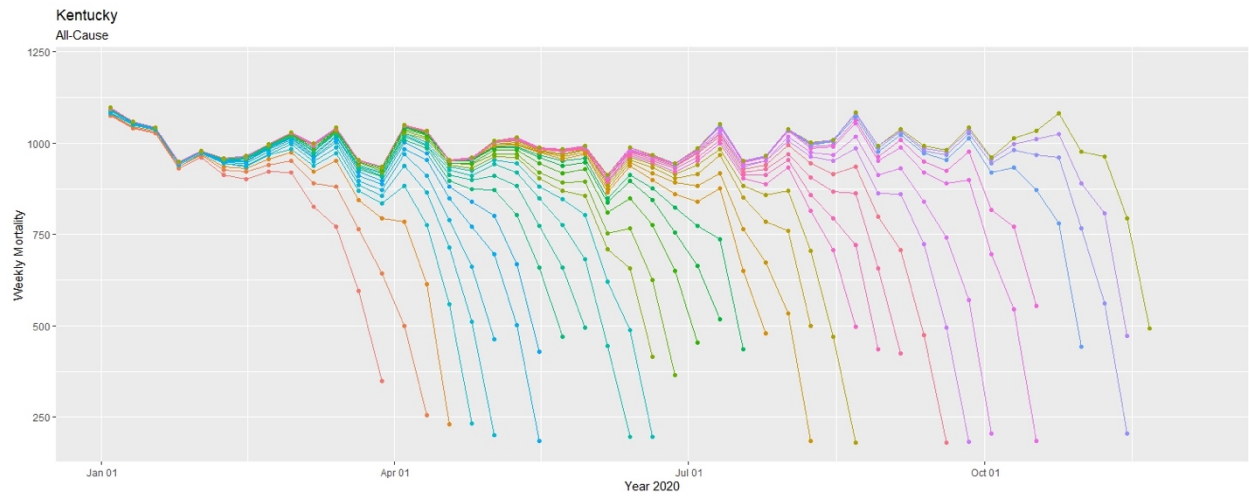

Louisiana  
All-Cause

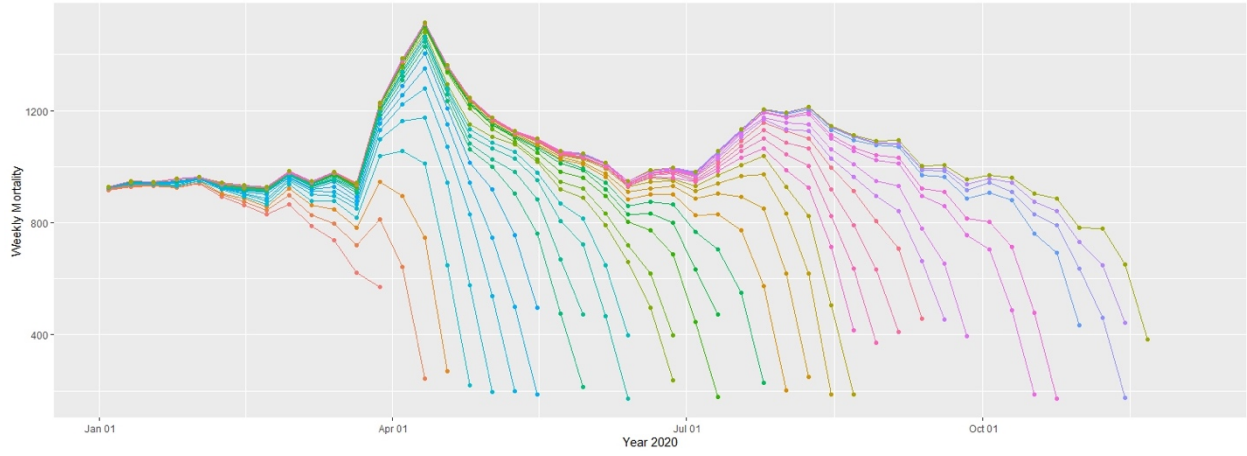

Maine  
All-Cause

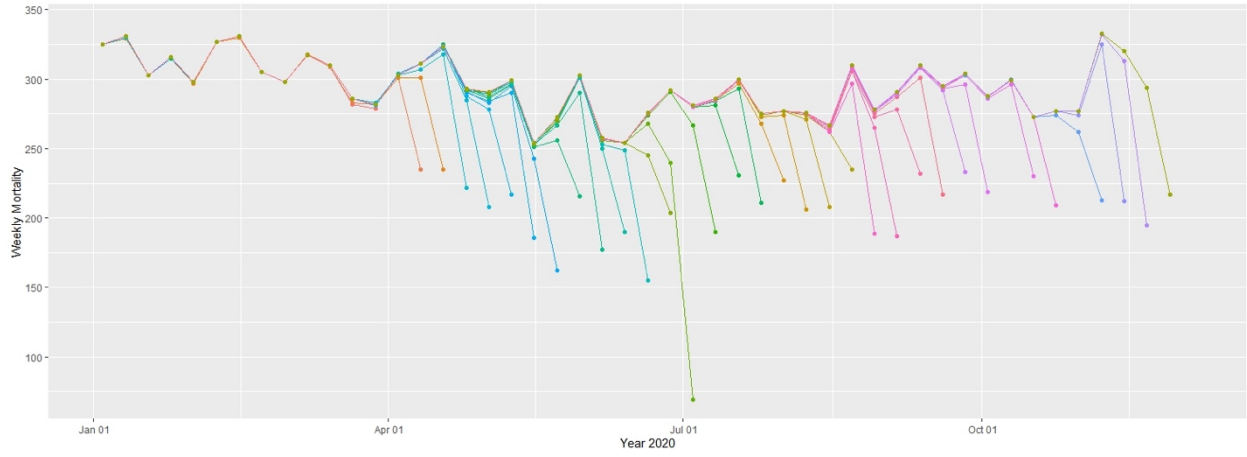

Maryland  
All-Cause

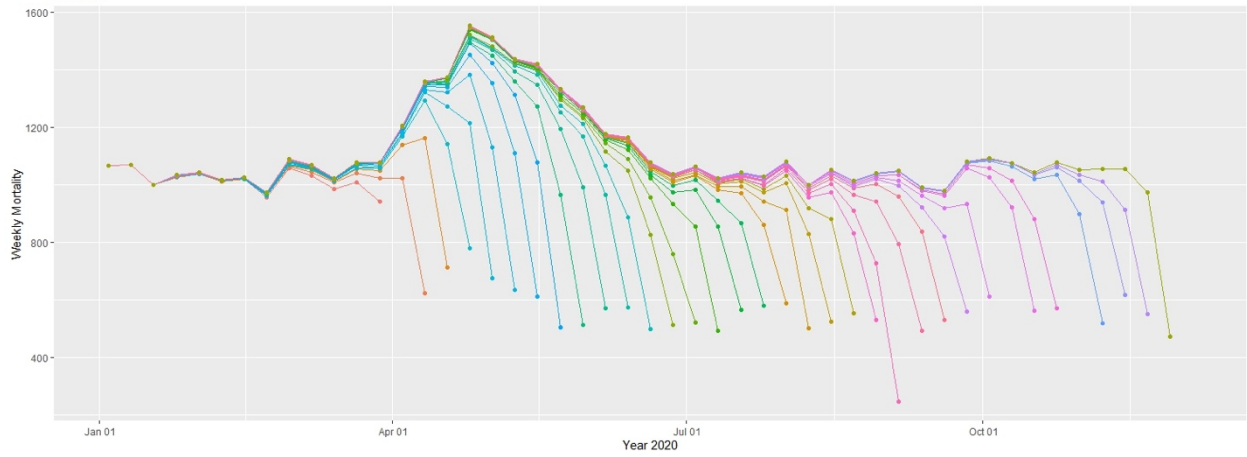

Massachusetts  
All-Cause

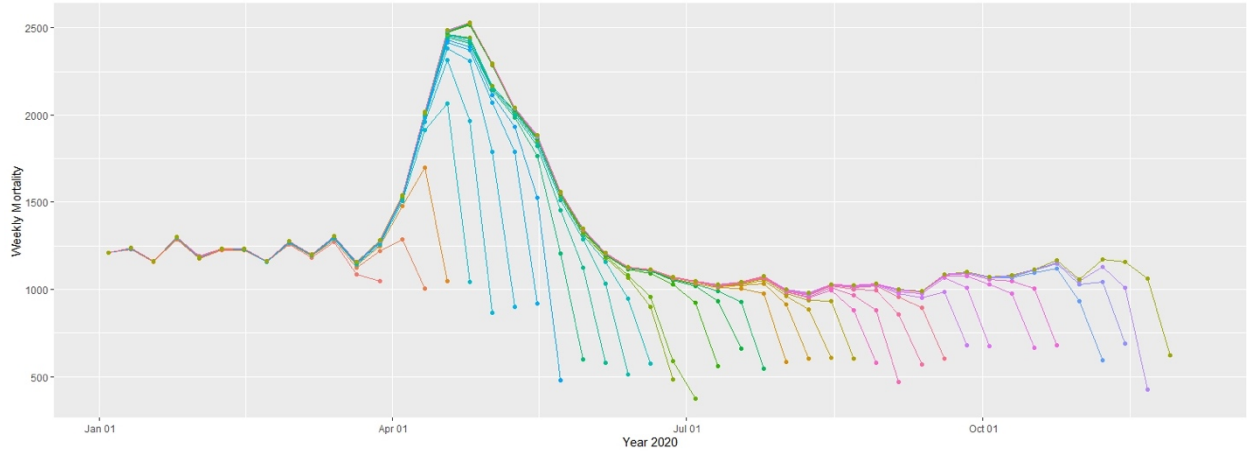

Michigan  
All-Cause

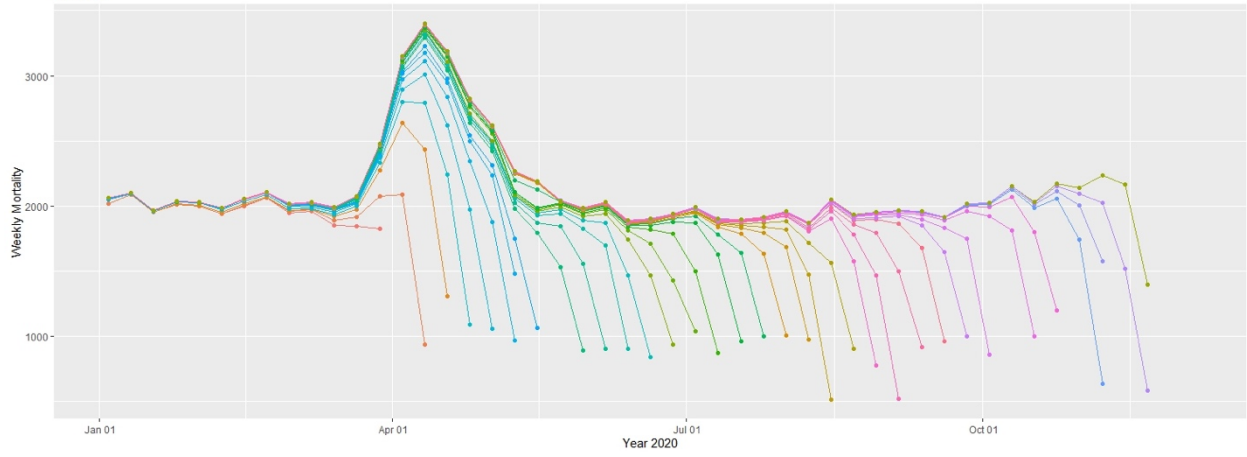

Minnesota  
All-Cause

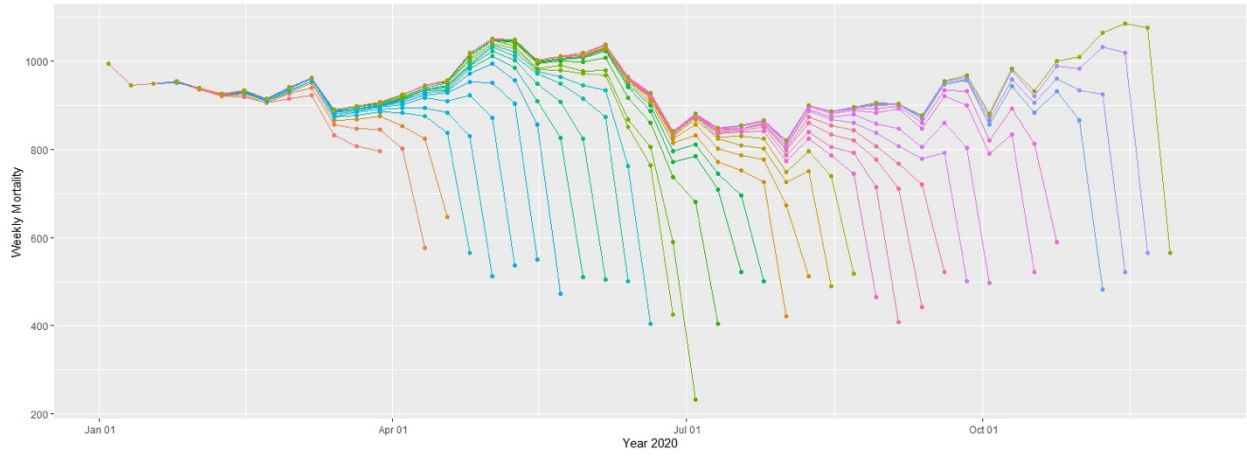

Mississippi  
All-Cause

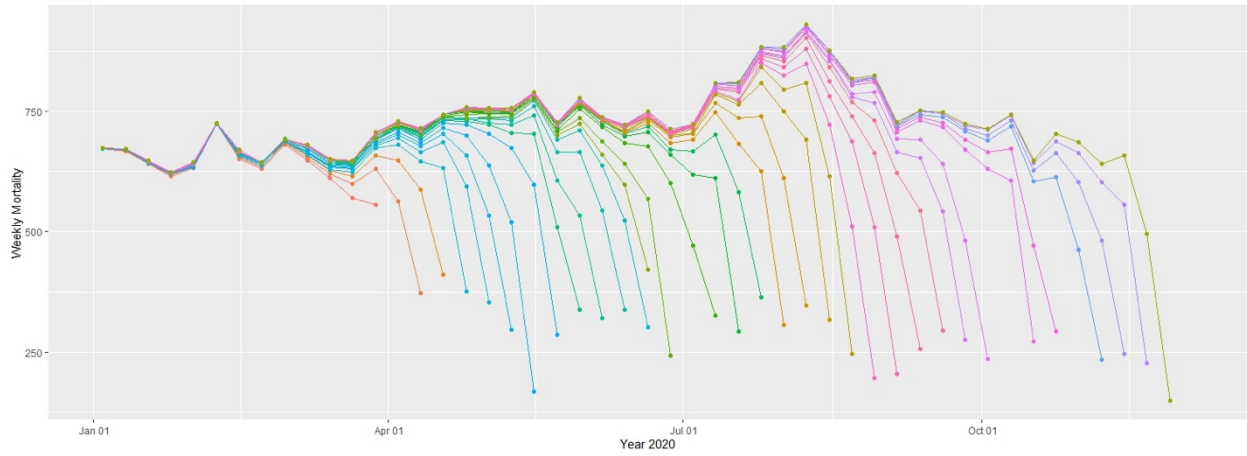

Missouri  
All-Cause

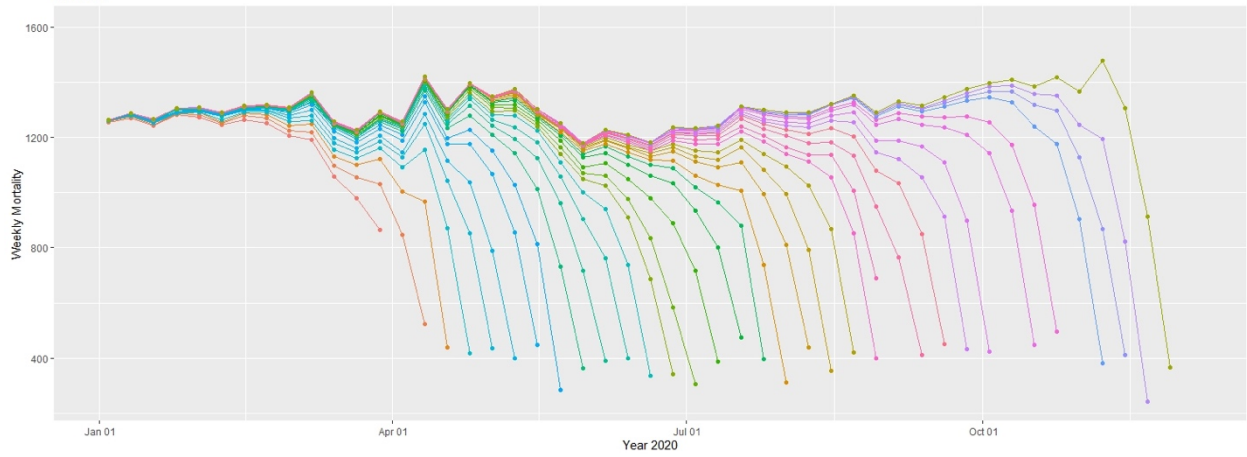

Montana  
All-Cause

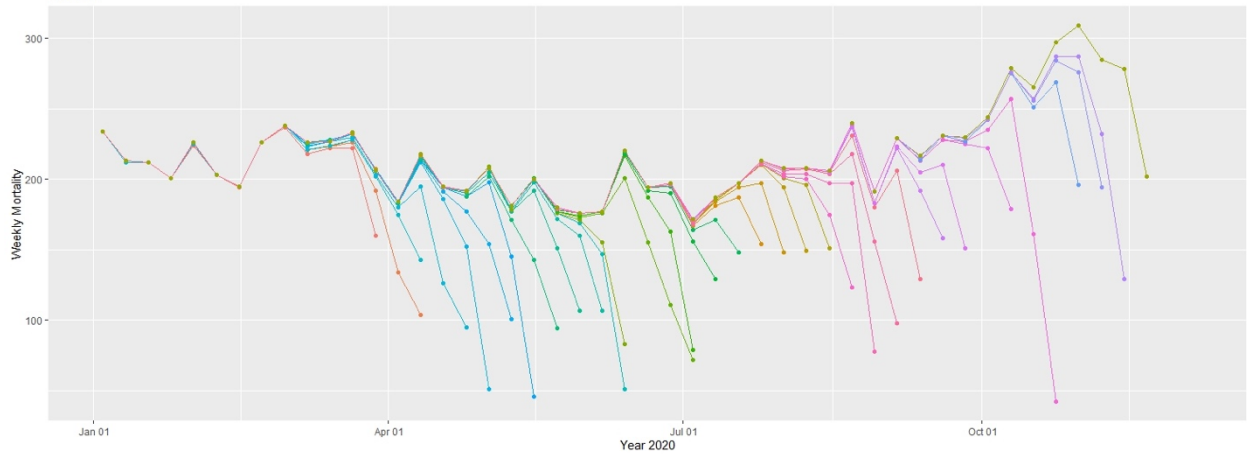



Nebraska  
All-Cause

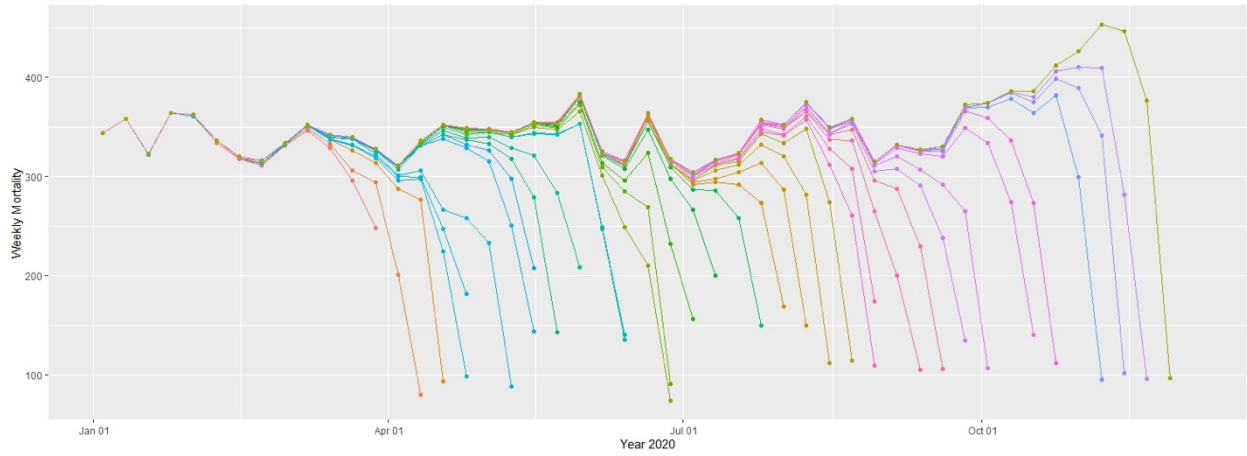

Nevada  
All-Cause

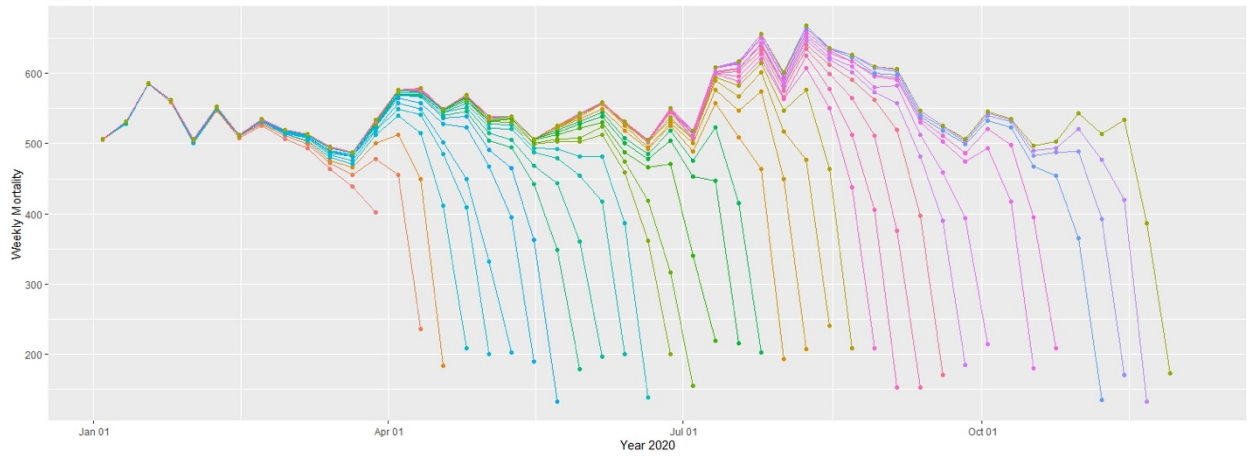

New Hampshire  
All-Cause

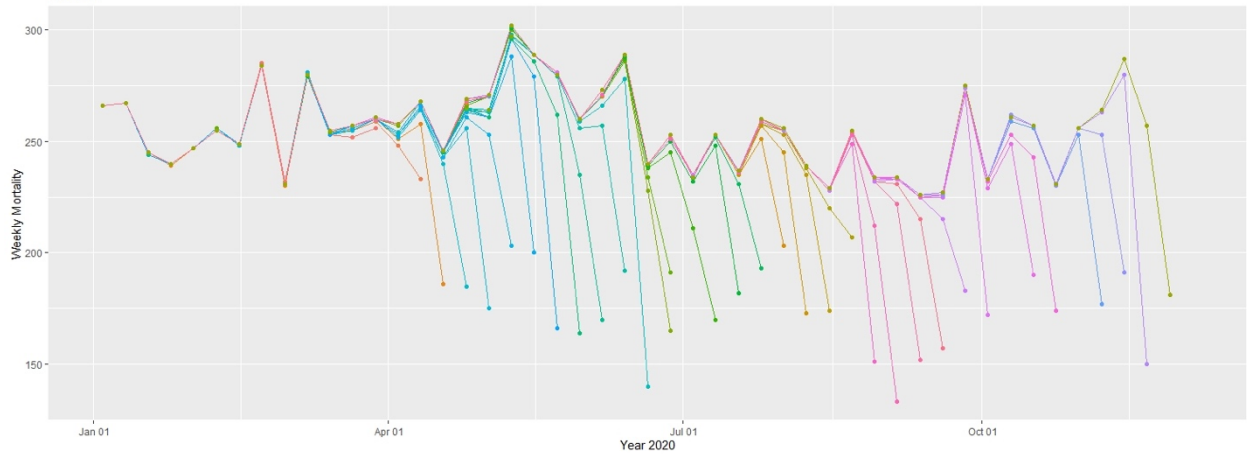

New Jersey  
All-Cause

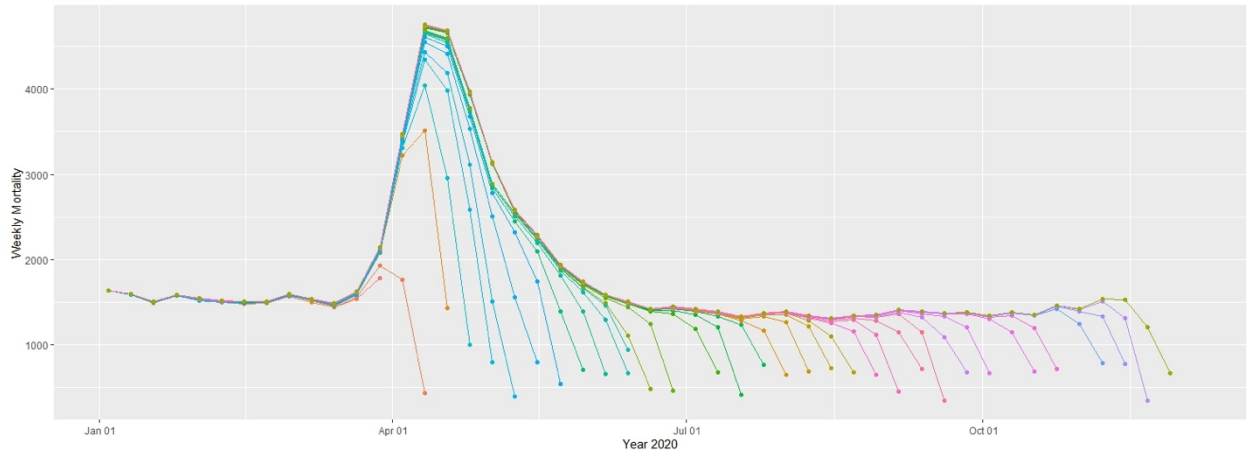

New Mexico  
All-Cause

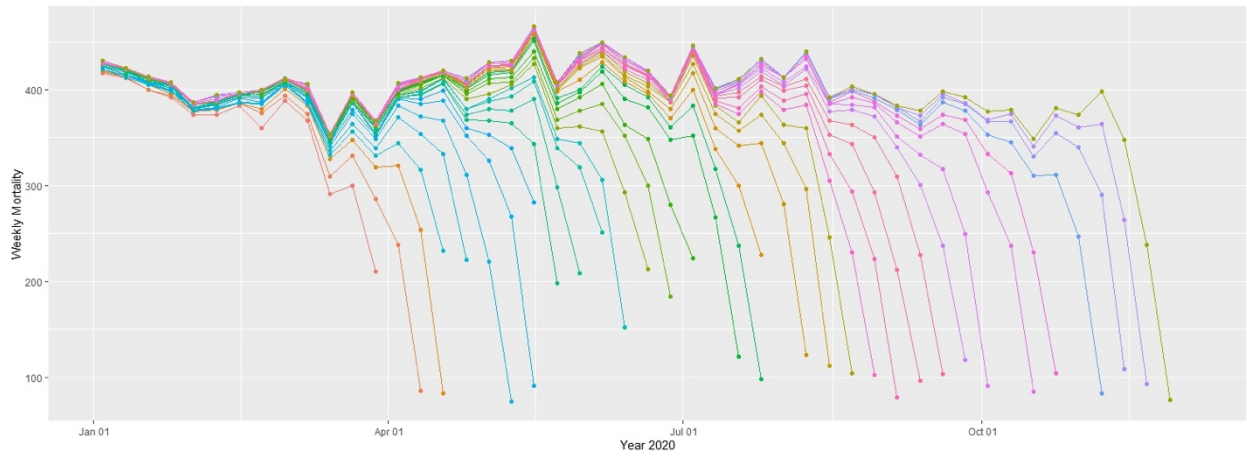

New York City  
All-Cause

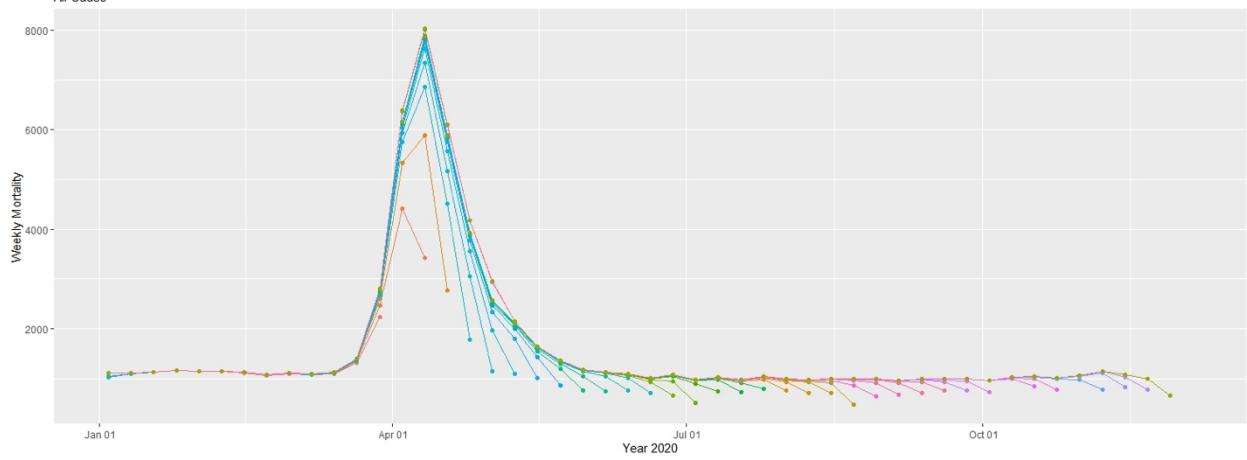

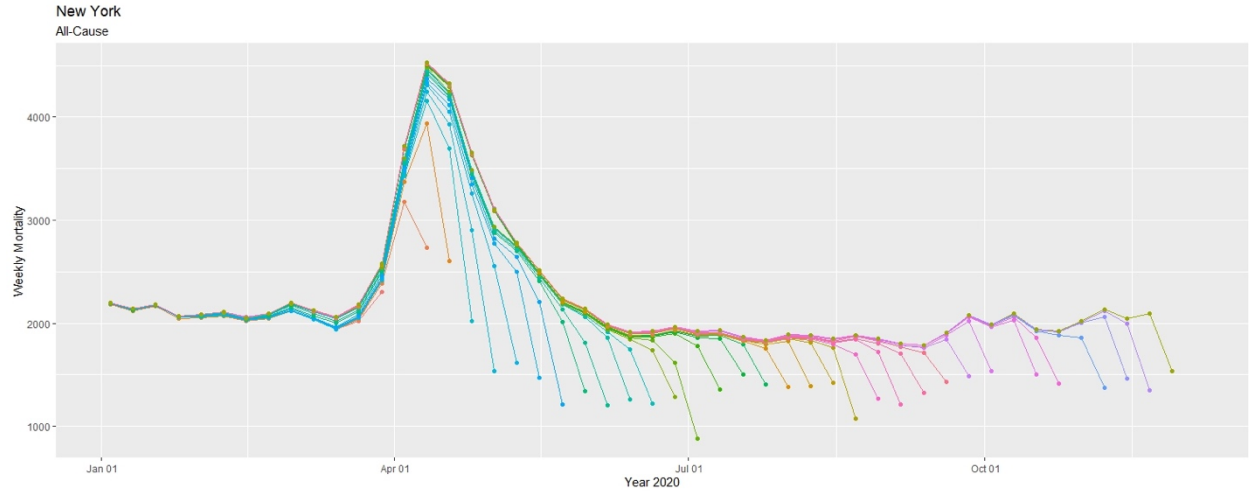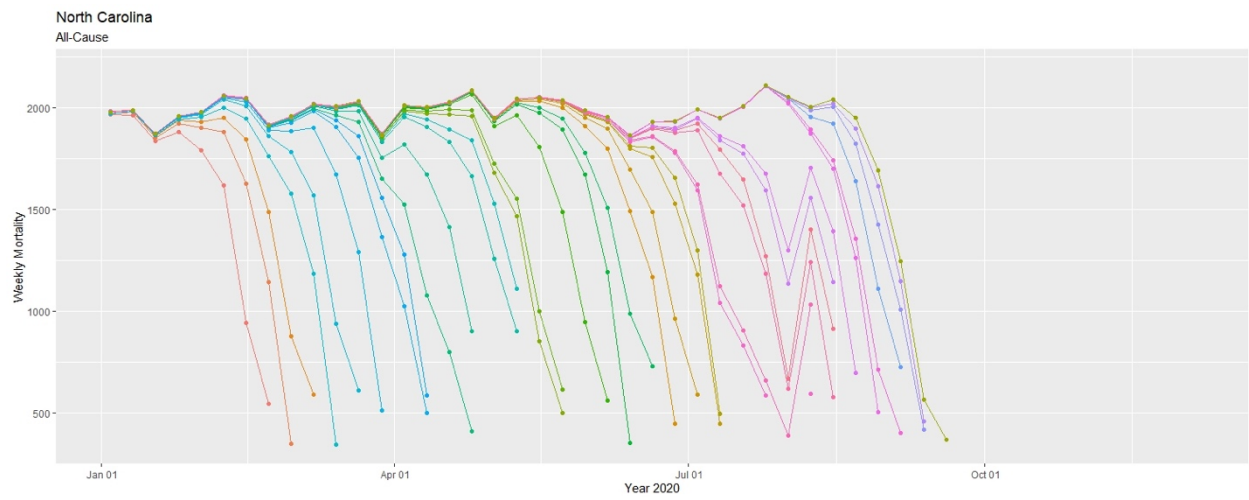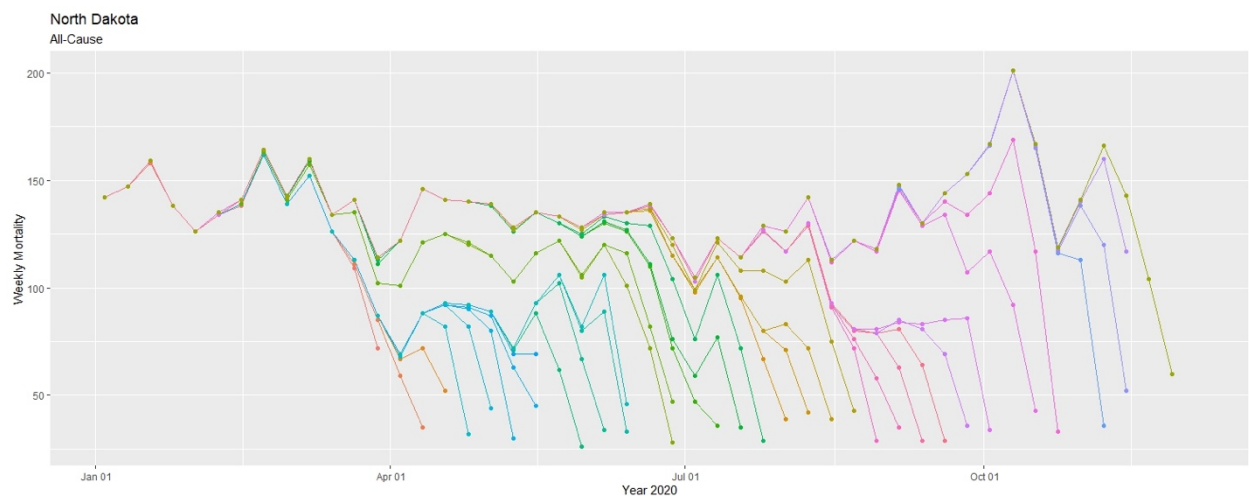

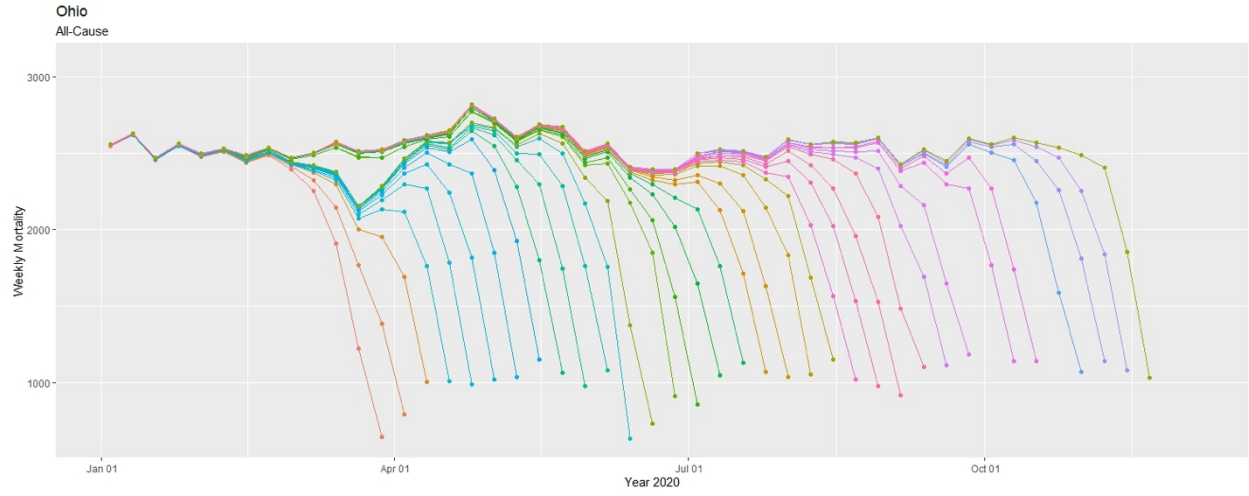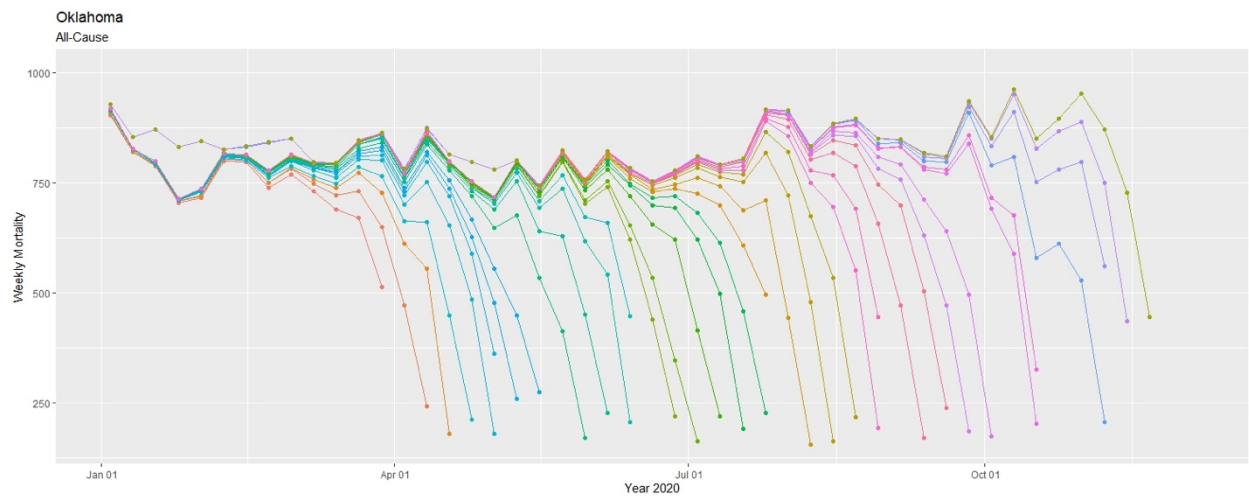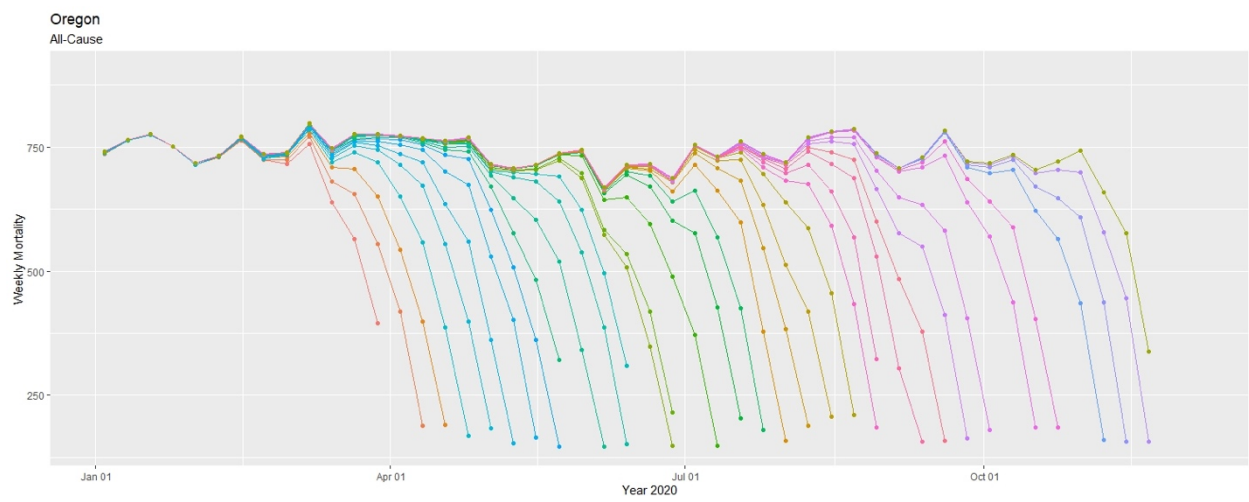

Pennsylvania  
All-Cause

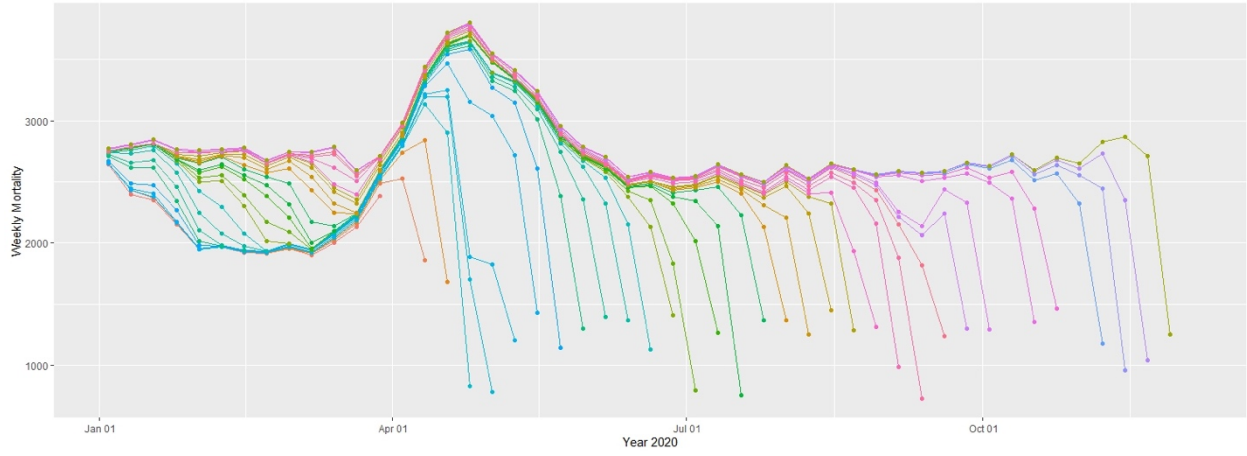

Rhode Island  
All-Cause

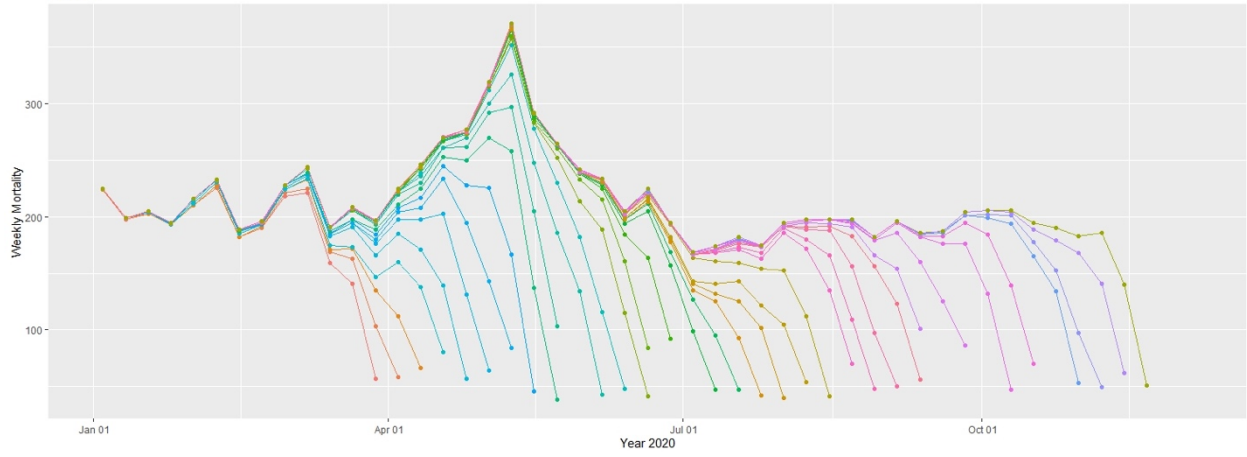

South Carolina  
All-Cause

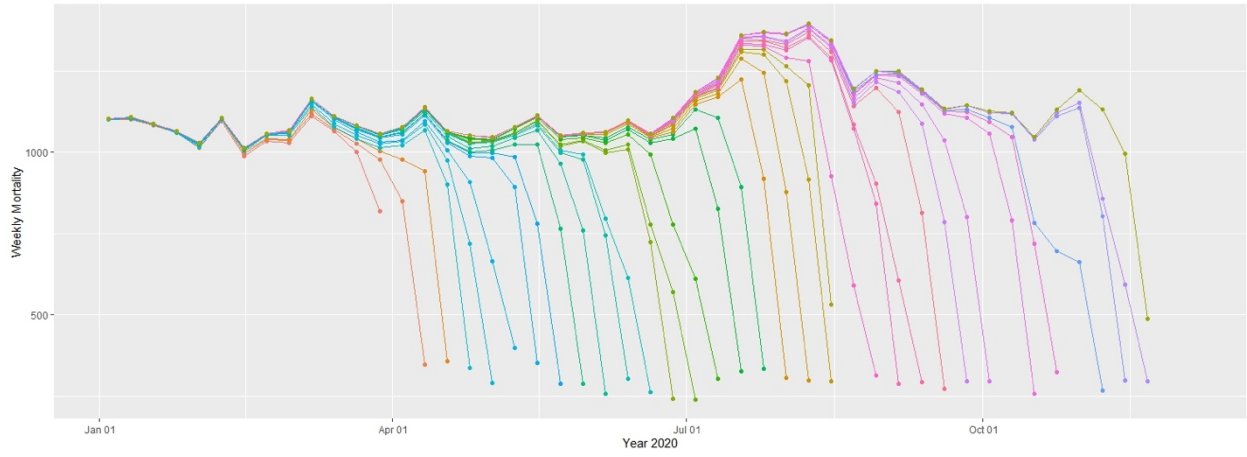

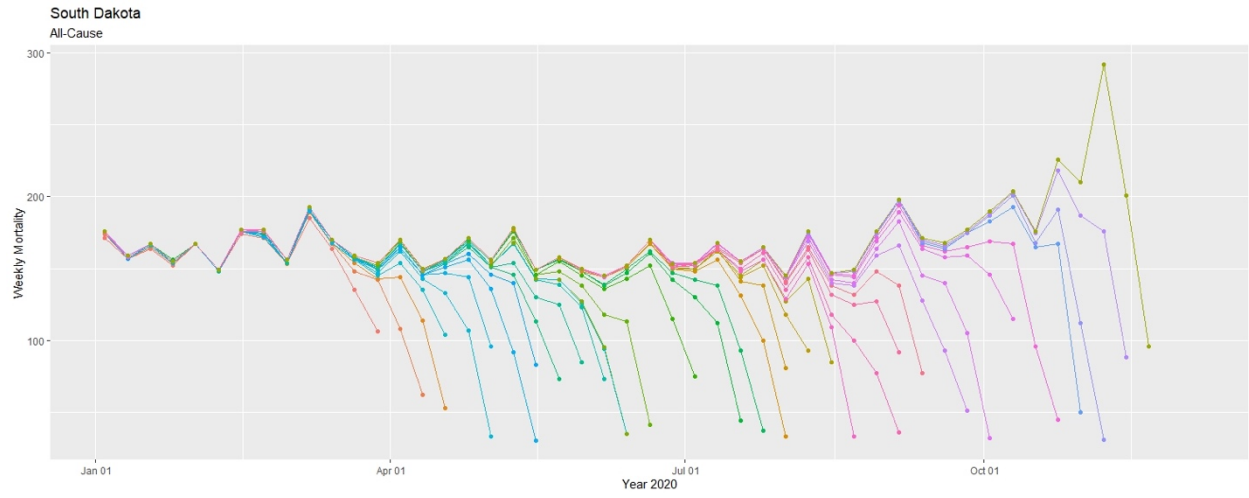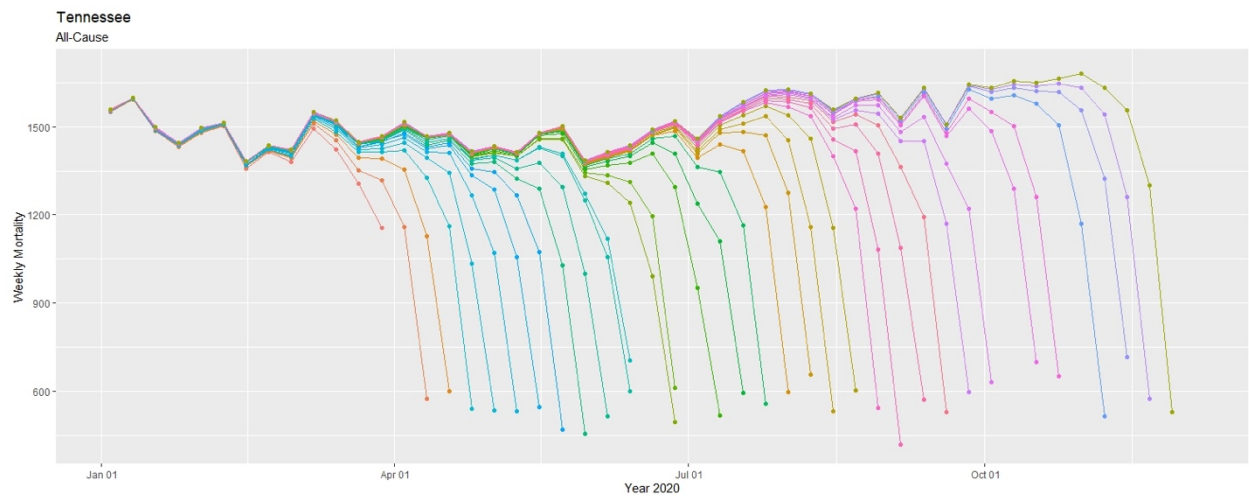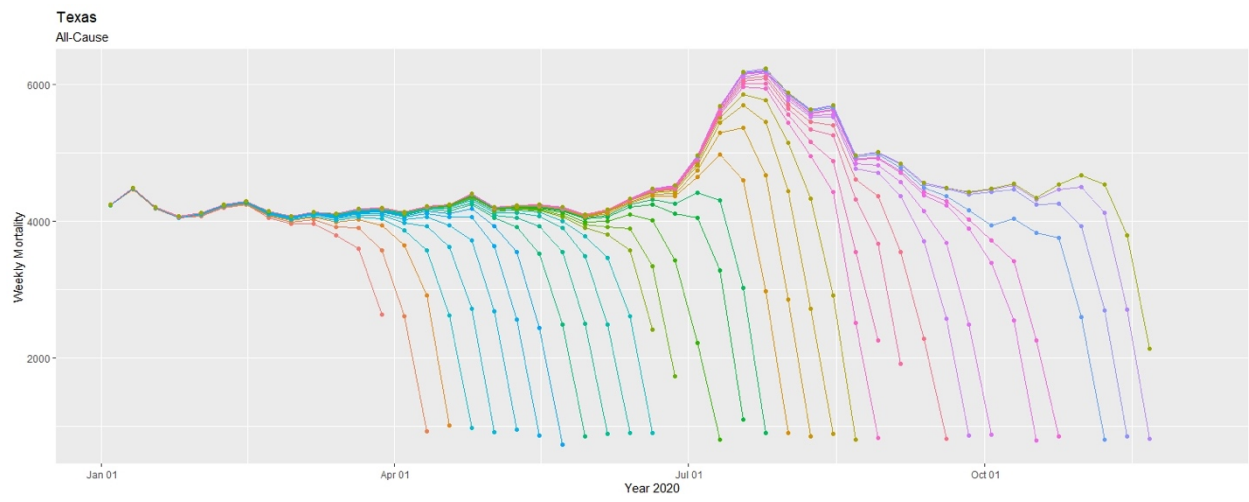

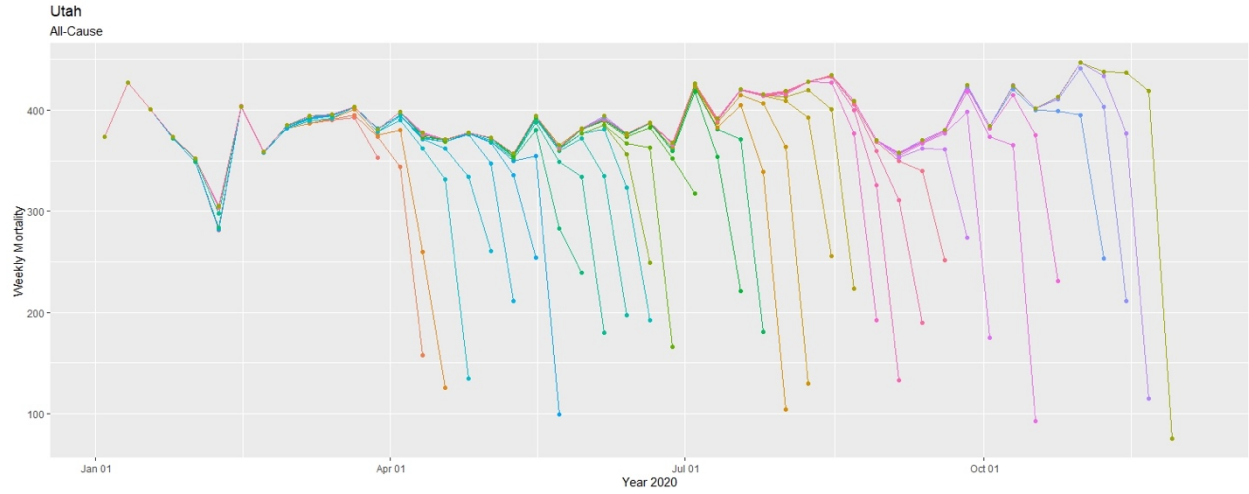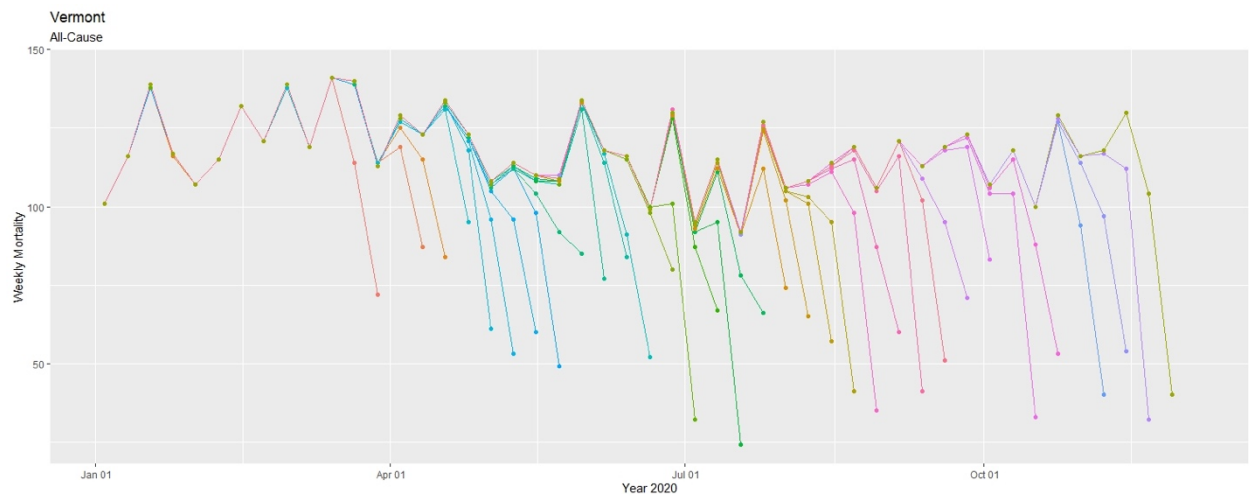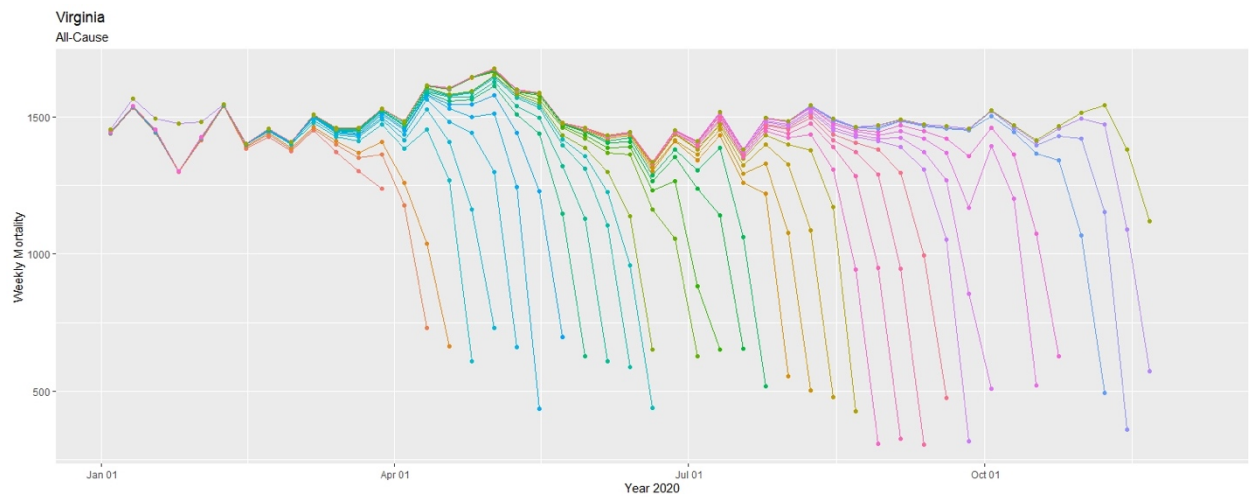

Washington  
All-Cause

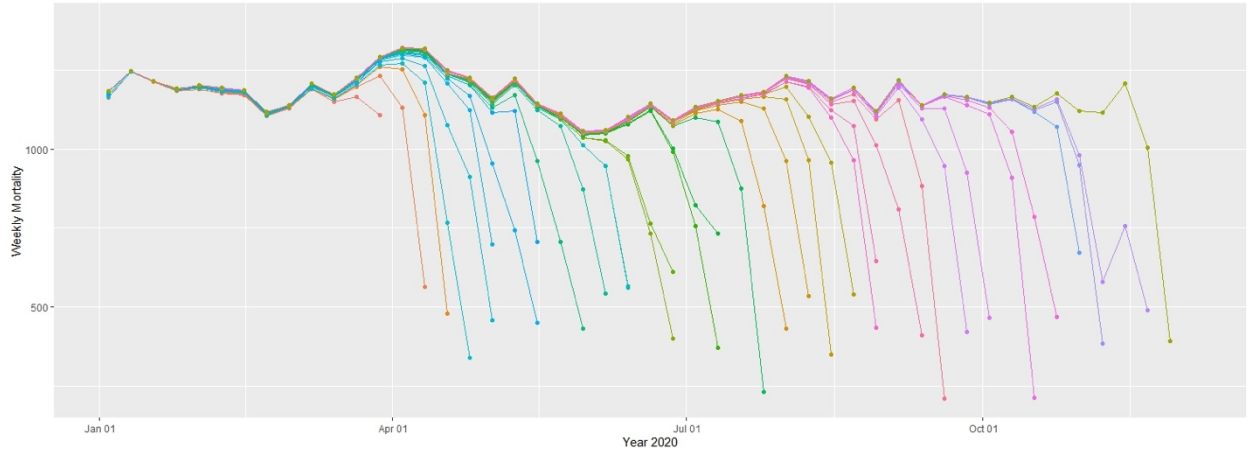

West Virginia  
All-Cause

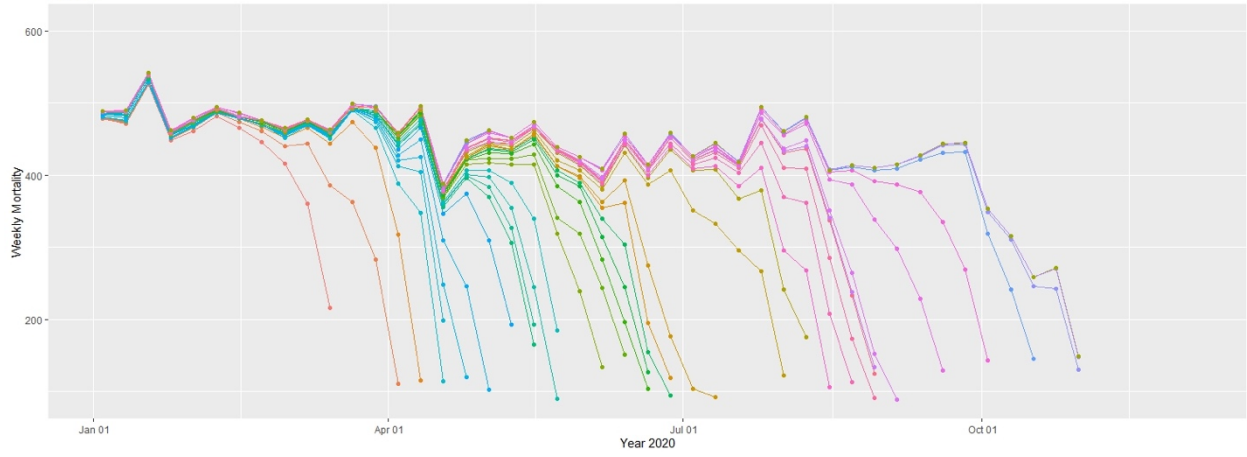



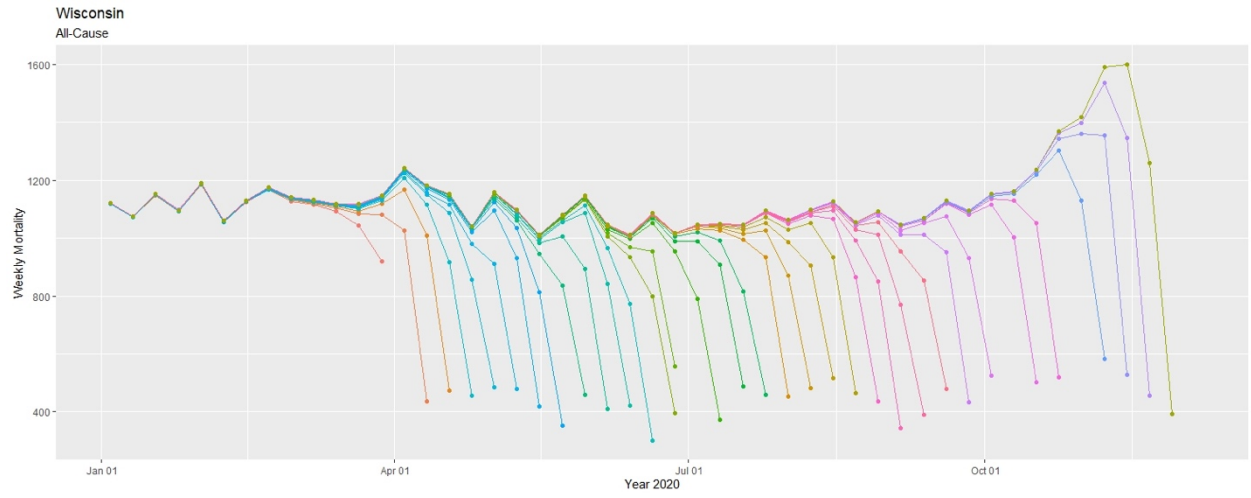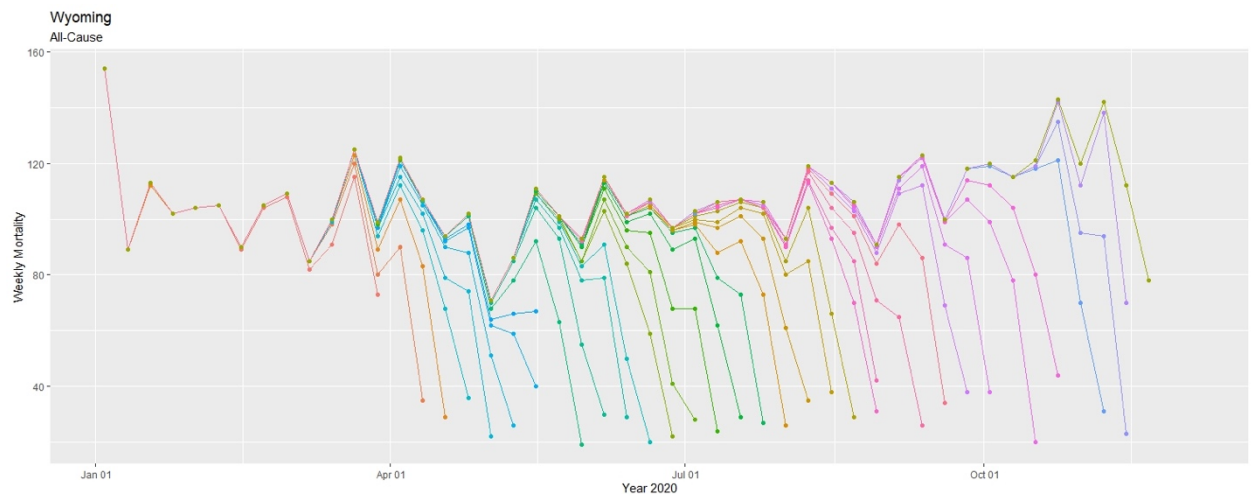

Supplement: 41271_2021_309_MOESM1_ESM.pdf [file 41271_2021_309_MOESM1_ESM.pdf]
